# Supplementary material for: Diagnostic Yield of Targeted Hearing Loss Gene Panel Sequencing in a Large German Cohort With a Balanced Age Distribution from a Single Diagnostic Center: An Eight-year Study
Source: PubMed Central journal article supplement — Ear Hear. 2021 Nov 8;43(3):1049–66. doi: 10.1097/AUD.0000000000001159 (PMC9007094; doi:10.1097/aud.0000000000001159), 2021-11-08

Diagnostic Yield of Targeted Hearing Loss Gene Panel Sequencing  
in a Large German Cohort with a Balanced Age Distribution  
from a Single Diagnostic Center: An Eight-Year Study

**Supplemental Digital Content 8.**

Pedigrees and audiograms of all solved cases with medically significant novel variants and medically significant variant reclassifications

**1. Novel variants in solved cases (n=13)**

| ID | Pedigree                                                                         | Audiogram |  |
|----|----------------------------------------------------------------------------------|-----------|--|
| 41 | <p data-bbox="176 867 275 927"><b>SMPX</b><br/>c.140del</p>                      |           |  |
| 55 | <p data-bbox="176 1273 386 1333"><b>TMPRSS3</b><br/>c.413C&gt;A; c.965C&gt;A</p> |           |  |

67

**COL11A1**  
c.2930G>C

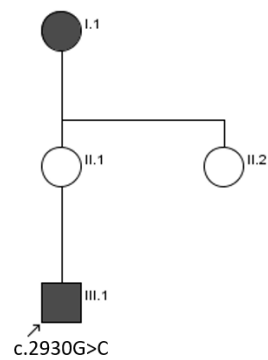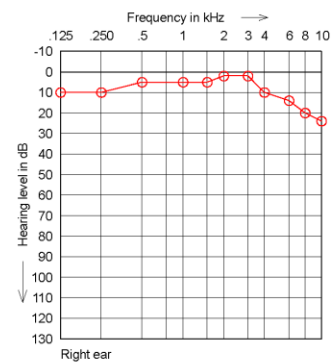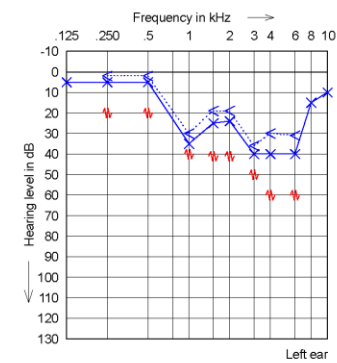

68

**MYO6**  
c.2397C>A

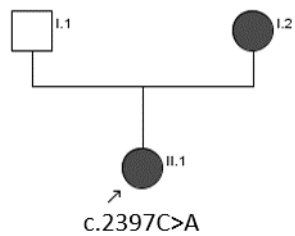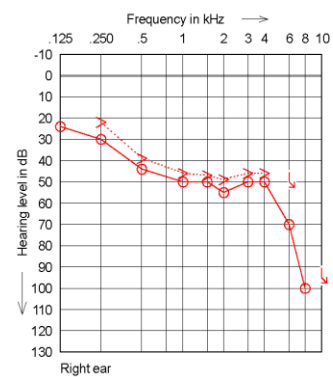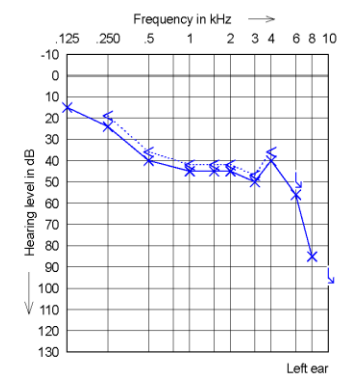

74

**SLC26A4**  
c.703C>T; c.1280C>A

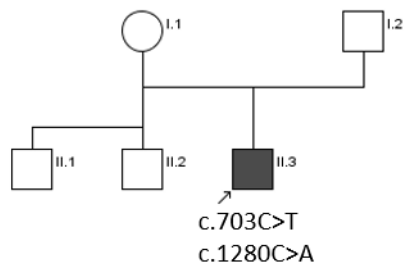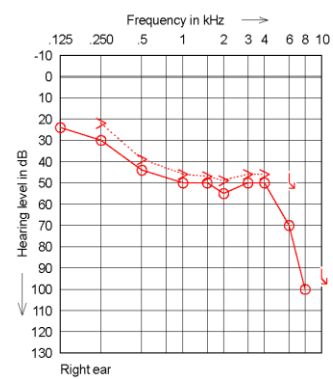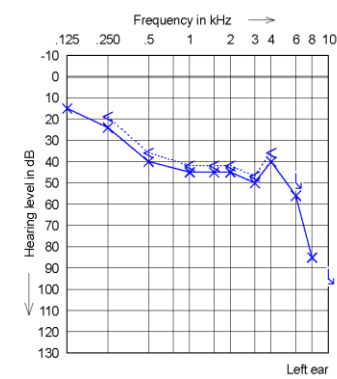

112

**MYO7A**  
c.1211G>A

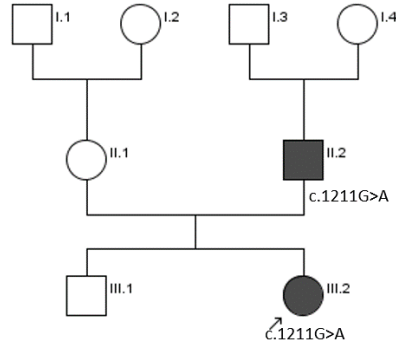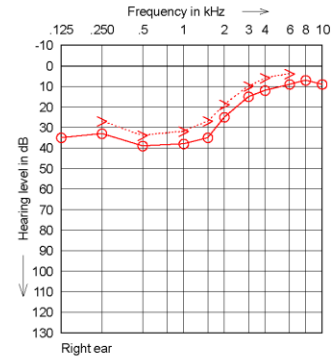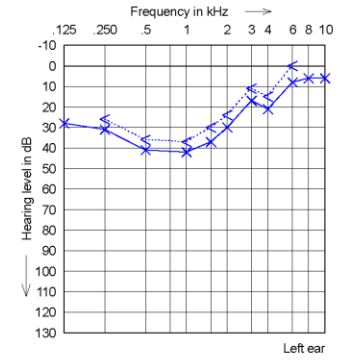

120

**EYA4**  
c.1481dup

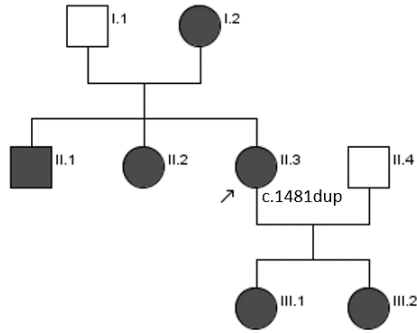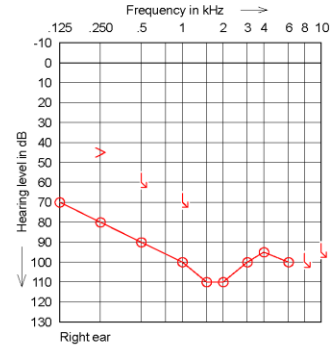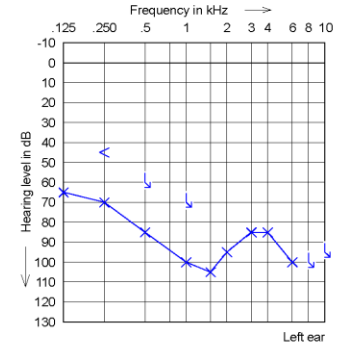

172

**POU4F3**  
c.545C>G

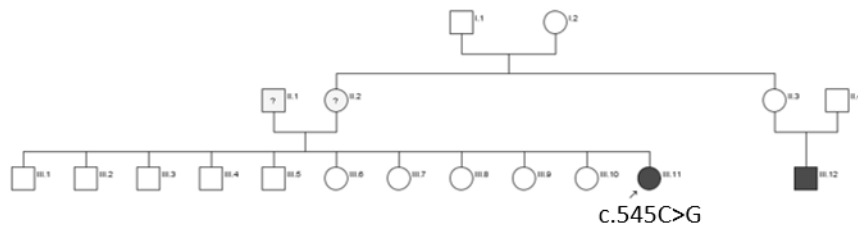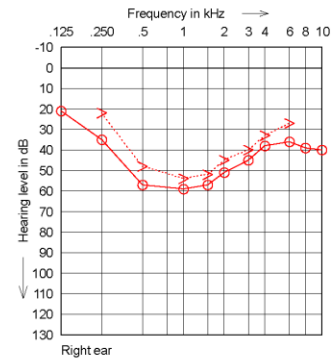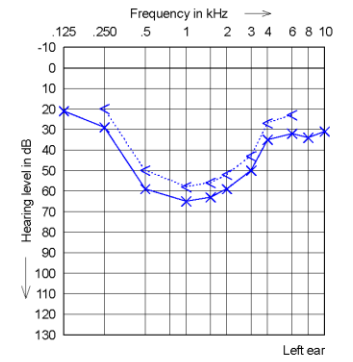

202

**TFAP2A**  
c.9G>A

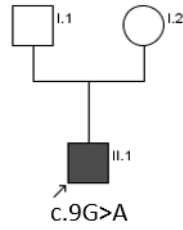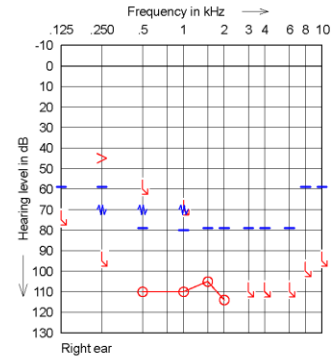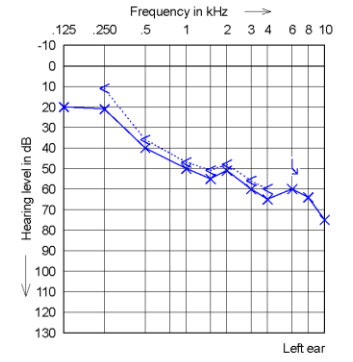

206

**TECTA**  
c.2785del; c.2367G>A

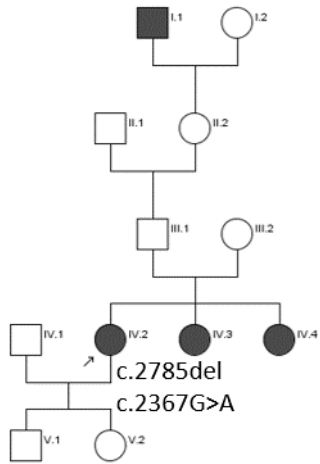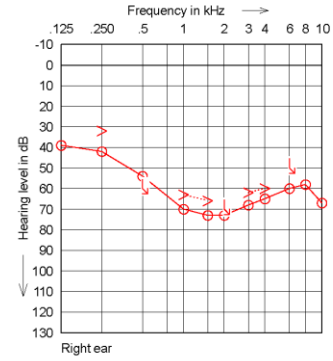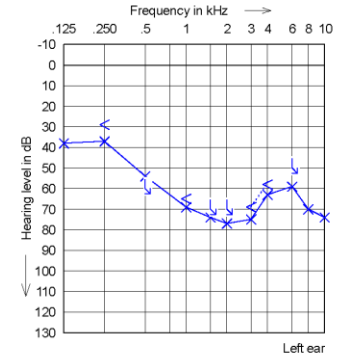

211

**KCNQ4**  
c.1251del

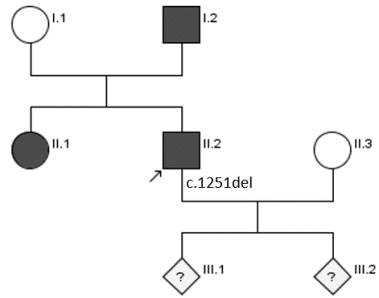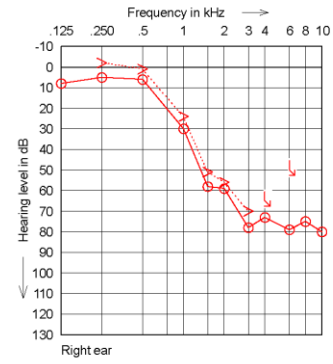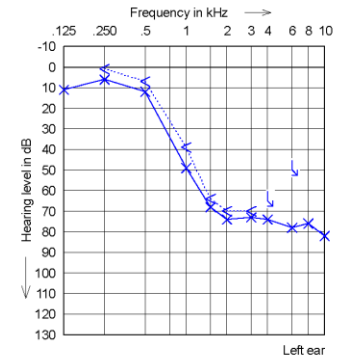

224

**GATA3**  
c.153dup

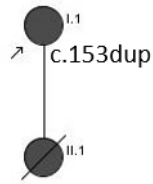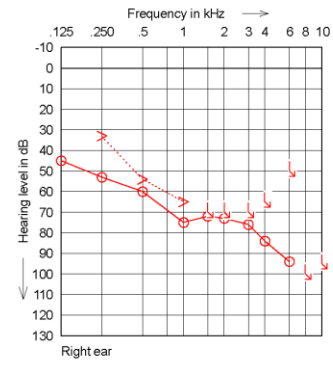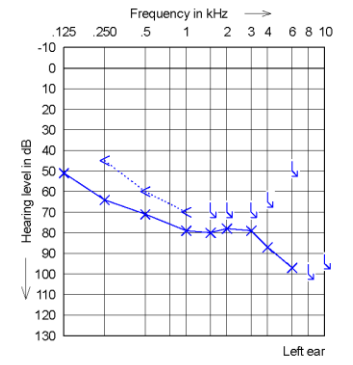

299

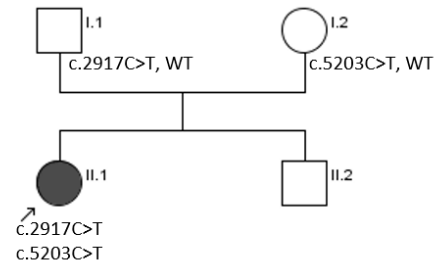

**OTOF**  
c.2719C>T; c.5203C>T

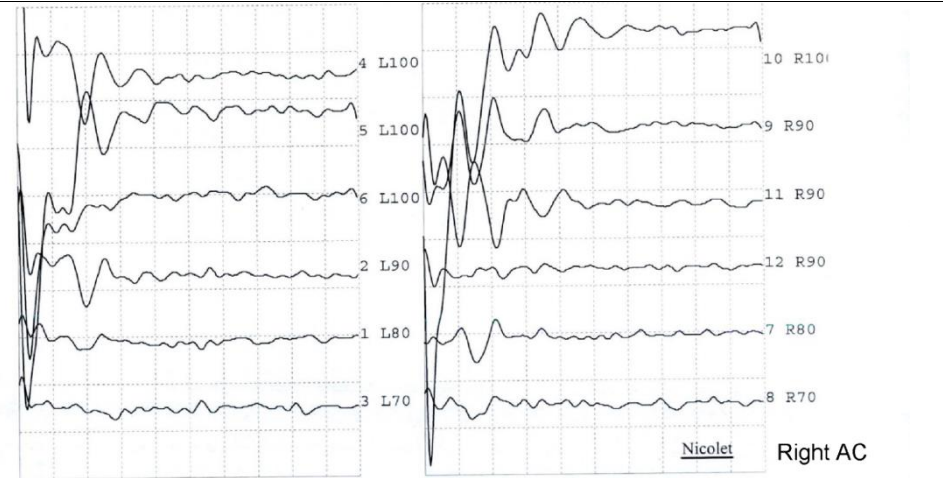

## 2. Medically significant variant reclassifications in solved cases (n=9)

| ID | Pedigree                                                                                                                 | Audiogram                                                                            |  |
|----|--------------------------------------------------------------------------------------------------------------------------|--------------------------------------------------------------------------------------|--|
| 32 | <p style="text-align: center;"><b>Pedigree</b></p> <p><b>COL4A3</b><br/>c.4882T&gt;G</p> <p><b>WT: COL4A3</b><br/>WT</p> | <p style="text-align: center;"><b>Audiogram</b></p> <p>Right ear</p> <p>Left ear</p> |  |
| 58 | <p style="text-align: center;"><b>Pedigree</b></p> <p><b>COL11A1</b><br/>c.2644C&gt;T</p>                                | <p style="text-align: center;"><b>Audiogram</b></p> <p>Right ear</p> <p>Left ear</p> |  |

59

**LOXHD1**  
**c.3061+1G>A; c.5144del**

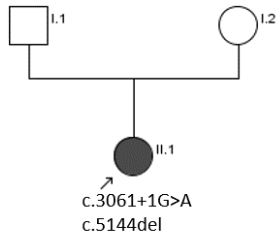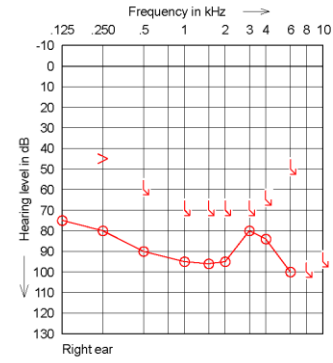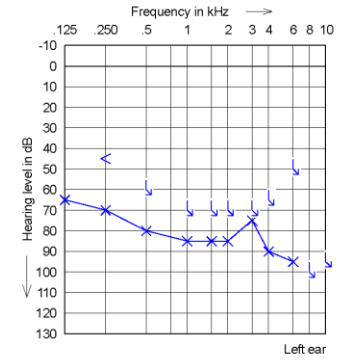

89

**LOXHD1**  
**c.5721T>A; c.5721T>A**

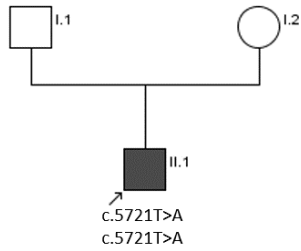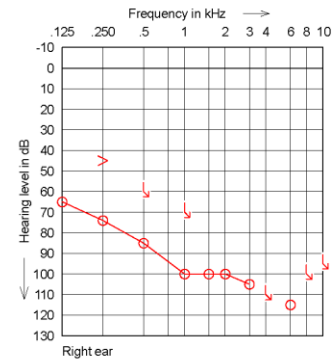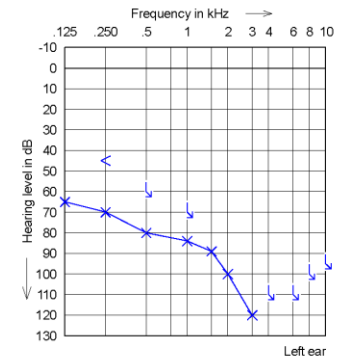



127

**EDNRB**  
c.18T>A

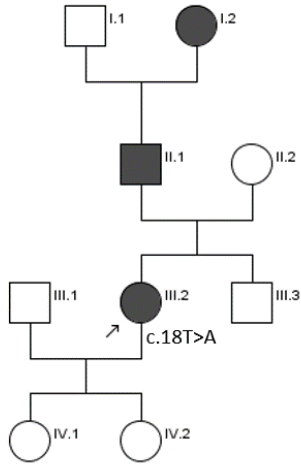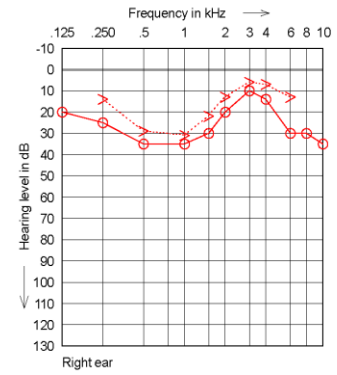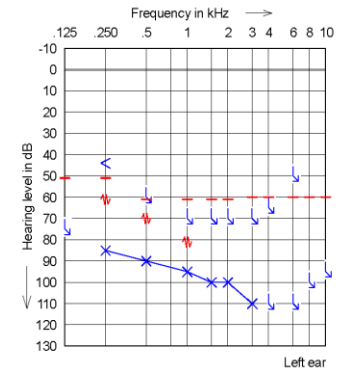

140

**MYO15A**  
c.1137del; c.2677C>T

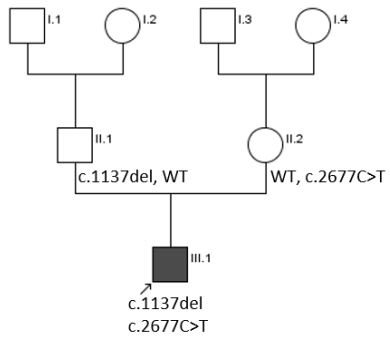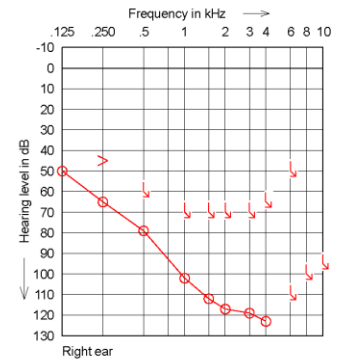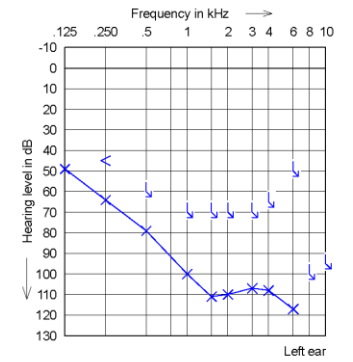

148

**WFS1**  
c.2054G>A

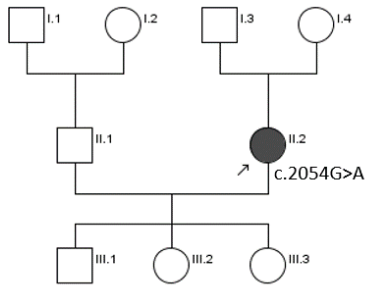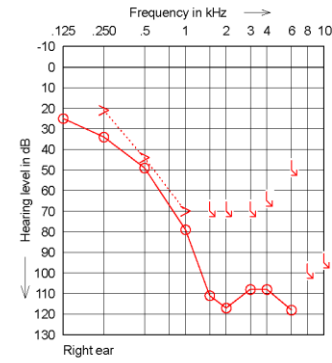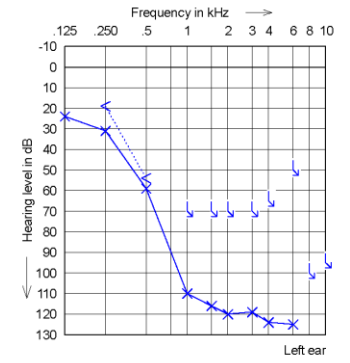

230

**COL9A2**  
c.1510C>A; c.1510C>A

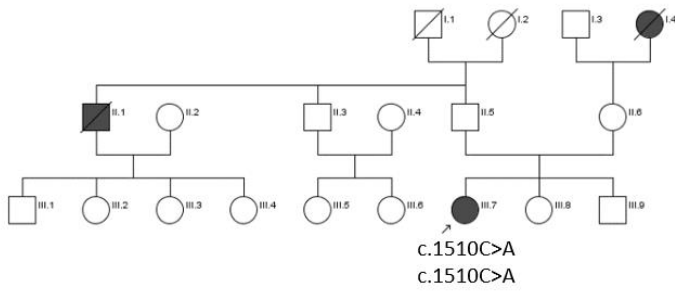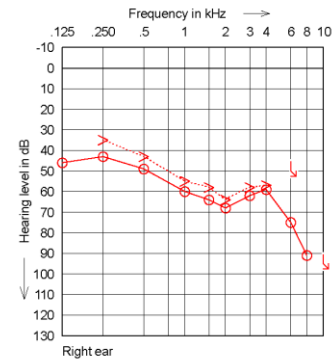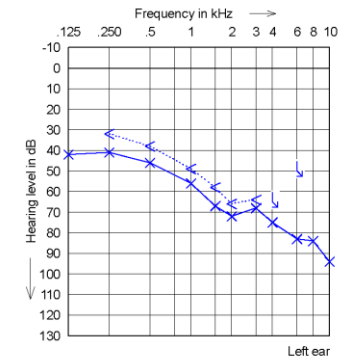

277

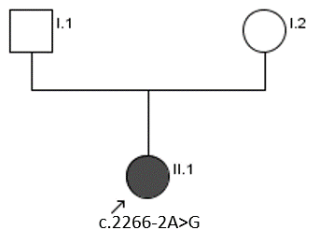

**DIAPH3**  
**c.2266-2A>G**

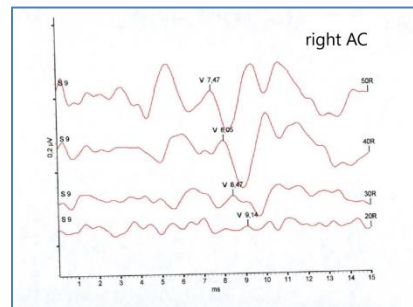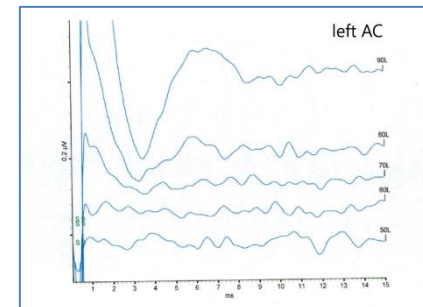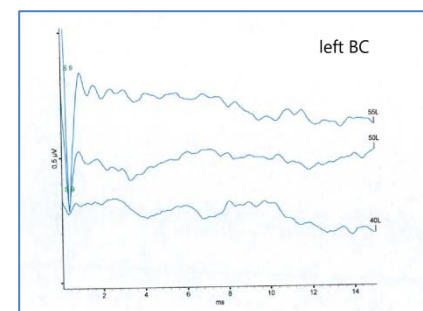

Supplement: aud-43-1049-s008.pdf [file aud-43-1049-s008.pdf]
