# Supplementary material for: Diagnostic Yield of Targeted Hearing Loss Gene Panel Sequencing in a Large German Cohort With a Balanced Age Distribution from a Single Diagnostic Center: An Eight-year Study
Source: PubMed Central journal article supplement — Ear Hear. 2021 Nov 8;43(3):1049–66. doi: 10.1097/AUD.0000000000001159 (PMC9007094; doi:10.1097/aud.0000000000001159), 2021-11-08
Supplement: aud-43-1049-s001.pdf [file aud-43-1049-s001.pdf]

Diagnostic Yield of Targeted Hearing Loss Gene Panel Sequencing  
in a Large German Cohort with a Balanced Age Distribution  
from a Single Diagnostic Center: An Eight-Year Study

**Supplemental Digital Content 1.**

List of Genes Included in Each of the Targeted Panel Versions over the study period (2011-2018)

| <b>Version 1</b>      | <b>Version 2</b>      | <b>Version 3</b>      | <b>Version 4</b>      | <b>Version 5</b>  |
|-----------------------|-----------------------|-----------------------|-----------------------|-------------------|
| 71 genes              | 95 genes              | 110 genes             | 164 genes             | 179 genes         |
| Oct 2011–<br>Apr 2012 | May 2012–<br>May 2013 | Jun 2013–<br>Nov 2014 | Dec 2014–<br>Sep 2017 | Oct 2017–<br>2018 |
|                       |                       | <i>ABHD12</i>         | <i>ABHD12</i>         | <i>ABHD12</i>     |
| <i>ACTG1</i>          | <i>ACTG1</i>          | <i>ACTG1</i>          | <i>ACTG1</i>          | <i>ACTG1</i>      |
|                       |                       |                       |                       | <i>ACYP2</i>      |
|                       |                       |                       |                       | <i>ADCY1</i>      |
| <i>ADGRV1</i>         | <i>ADGRV1</i>         | <i>ADGRV1</i>         | <i>ADGRV1</i>         | <i>ADGRV1</i>     |
|                       |                       |                       |                       | <i>AIFM1</i>      |
|                       |                       |                       | <i>ALMS1</i>          | <i>ALMS1</i>      |
|                       |                       | <i>ANKH</i>           | <i>ANKH</i>           | <i>ANKH</i>       |
|                       |                       |                       | <i>ATOH1</i>          |                   |
|                       |                       |                       | <i>ATP2B2</i>         |                   |
|                       |                       | <i>ATP6V1B1</i>       | <i>ATP6V1B1</i>       | <i>ATP6V1B1</i>   |
|                       |                       |                       |                       | <i>BCAP31</i>     |
|                       |                       |                       |                       | <i>BCS1L</i>      |
|                       |                       |                       | <i>BDP1</i>           | <i>BDP1</i>       |
| <i>BSND</i>           | <i>BSND</i>           | <i>BSND</i>           | <i>BSND</i>           | <i>BSND</i>       |
|                       |                       |                       | <i>CABP2</i>          | <i>CABP2</i>      |
|                       |                       | <i>CACNA1D</i>        | <i>CACNA1D</i>        | <i>CACNA1D</i>    |
|                       |                       |                       |                       | <i>CATSPER2</i>   |
| <i>CCDC50</i>         | <i>CCDC50</i>         | <i>CCDC50</i>         | <i>CCDC50</i>         | <i>CCDC50</i>     |
|                       |                       |                       | <i>CD151</i>          | <i>CD151</i>      |
|                       |                       |                       |                       | <i>CD164</i>      |
|                       |                       |                       |                       | <i>CDC14A</i>     |
| <i>CDH23</i>          | <i>CDH23</i>          | <i>CDH23</i>          | <i>CDH23</i>          | <i>CDH23</i>      |
|                       |                       | <i>CDKN1C</i>         | <i>CDKN1C</i>         | <i>CDKN1C</i>     |
|                       |                       | <i>CEACAM16</i>       | <i>CEACAM16</i>       | <i>CEACAM16</i>   |
|                       |                       |                       | <i>CELSR1</i>         |                   |
|                       | <i>CHD7</i>           | <i>CHD7</i>           | <i>CHD7</i>           | <i>CHD7</i>       |
|                       |                       |                       | <i>CHSY1</i>          | <i>CHSY1</i>      |
|                       |                       | <i>CIB2</i>           | <i>CIB2</i>           | <i>CIB2</i>       |

|                |                |                |                |                |
|----------------|----------------|----------------|----------------|----------------|
|                |                |                |                | <i>CISD2</i>   |
| <i>CLDN14</i>  | <i>CLDN14</i>  | <i>CLDN14</i>  | <i>CLDN14</i>  | <i>CLDN14</i>  |
|                |                |                | <i>CLDN9</i>   |                |
|                |                |                | <i>CLIC5</i>   | <i>CLIC5</i>   |
|                |                |                |                | <i>CLPP</i>    |
| <i>CLRN1</i>   | <i>CLRN1</i>   | <i>CLRN1</i>   | <i>CLRN1</i>   | <i>CLRN1</i>   |
| <i>CLRN3</i>   | <i>CLRN3</i>   | <i>CLRN3</i>   | <i>CLRN3</i>   |                |
| <i>COCH</i>    | <i>COCH</i>    | <i>COCH</i>    | <i>COCH</i>    | <i>COCH</i>    |
|                | <i>COL11A1</i> | <i>COL11A1</i> | <i>COL11A1</i> | <i>COL11A1</i> |
| <i>COL11A2</i> | <i>COL11A2</i> | <i>COL11A2</i> | <i>COL11A2</i> | <i>COL11A2</i> |
|                | <i>COL2A1</i>  | <i>COL2A1</i>  | <i>COL2A1</i>  | <i>COL2A1</i>  |
|                | <i>COL4A3</i>  | <i>COL4A3</i>  | <i>COL4A3</i>  | <i>COL4A3</i>  |
|                | <i>COL4A4</i>  | <i>COL4A4</i>  | <i>COL4A4</i>  | <i>COL4A4</i>  |
|                | <i>COL4A5</i>  | <i>COL4A5</i>  | <i>COL4A5</i>  | <i>COL4A5</i>  |
|                |                |                | <i>COL4A6</i>  | <i>COL4A6</i>  |
|                | <i>COL9A1</i>  | <i>COL9A1</i>  | <i>COL9A1</i>  | <i>COL9A1</i>  |
|                | <i>COL9A2</i>  | <i>COL9A2</i>  | <i>COL9A2</i>  | <i>COL9A2</i>  |
|                |                |                | <i>COL9A3</i>  | <i>COL9A3</i>  |
| <i>CRYM</i>    | <i>CRYM</i>    | <i>CRYM</i>    | <i>CRYM</i>    | <i>CRYM</i>    |
|                |                |                |                | <i>DCDC2</i>   |
| <i>DIABLO</i>  | <i>DIABLO</i>  | <i>DIABLO</i>  | <i>DIABLO</i>  | <i>DIABLO</i>  |
| <i>DIAPH1</i>  | <i>DIAPH1</i>  | <i>DIAPH1</i>  | <i>DIAPH1</i>  | <i>DIAPH1</i>  |
|                | <i>DIAPH3</i>  | <i>DIAPH3</i>  | <i>DIAPH3</i>  | <i>DIAPH3</i>  |
|                |                | <i>DLX5</i>    | <i>DLX5</i>    | <i>DLX5</i>    |
|                |                |                |                | <i>DMXL2</i>   |
|                |                |                |                | <i>DNMT1</i>   |
| <i>DSPP</i>    | <i>DSPP</i>    | <i>DSPP</i>    | <i>DSPP</i>    | <i>DSPP</i>    |
|                |                |                |                | <i>DUOX2</i>   |
|                |                |                | <i>DZANK1</i>  |                |
|                | <i>EDN3</i>    | <i>EDN3</i>    | <i>EDN3</i>    | <i>EDN3</i>    |
|                | <i>EDNRB</i>   | <i>EDNRB</i>   | <i>EDNRB</i>   | <i>EDNRB</i>   |
|                |                |                |                | <i>ELMOD3</i>  |
|                |                |                |                | <i>EPS8</i>    |
|                |                |                |                | <i>EPS8L2</i>  |
| <i>ESPN</i>    | <i>ESPN</i>    | <i>ESPN</i>    | <i>ESPN</i>    | <i>ESPN</i>    |
|                |                |                | <i>ESR1</i>    |                |
|                |                |                | <i>ESR2</i>    |                |
| <i>ESRRB</i>   | <i>ESRRB</i>   | <i>ESRRB</i>   | <i>ESRRB</i>   | <i>ESRRB</i>   |
|                |                |                |                | <i>EXOSC2</i>  |

|               |               |               |                |                |
|---------------|---------------|---------------|----------------|----------------|
|               | <i>EYA1</i>   | <i>EYA1</i>   | <i>EYA1</i>    | <i>EYA1</i>    |
| <i>EYA4</i>   | <i>EYA4</i>   | <i>EYA4</i>   | <i>EYA4</i>    | <i>EYA4</i>    |
|               |               |               | <i>FAM107B</i> |                |
|               |               | <i>FGF3</i>   | <i>FGF3</i>    | <i>FGF3</i>    |
|               | <i>FOXI1</i>  | <i>FOXI1</i>  | <i>FOXI1</i>   | <i>FOXI1</i>   |
|               |               | <i>GATA3</i>  | <i>GATA3</i>   | <i>GATA3</i>   |
|               |               |               | <i>GIPC1</i>   |                |
| <i>GIPC3</i>  | <i>GIPC3</i>  | <i>GIPC3</i>  | <i>GIPC3</i>   | <i>GIPC3</i>   |
|               |               |               |                | <i>GJA1</i>    |
| <i>GJB2</i>   | <i>GJB2</i>   | <i>GJB2</i>   | <i>GJB2</i>    | <i>GJB2</i>    |
| <i>GJB3</i>   | <i>GJB3</i>   | <i>GJB3</i>   | <i>GJB3</i>    | <i>GJB3</i>    |
|               |               |               |                | <i>GJB4</i>    |
| <i>GJB6</i>   | <i>GJB6</i>   | <i>GJB6</i>   | <i>GJB6</i>    | <i>GJB6</i>    |
|               |               |               |                | <i>GPRASP2</i> |
| <i>GPSM2</i>  | <i>GPSM2</i>  | <i>GPSM2</i>  | <i>GPSM2</i>   | <i>GPSM2</i>   |
| <i>GRHL2</i>  | <i>GRHL2</i>  | <i>GRHL2</i>  | <i>GRHL2</i>   | <i>GRHL2</i>   |
| <i>GRXCR1</i> | <i>GRXCR1</i> | <i>GRXCR1</i> | <i>GRXCR1</i>  | <i>GRXCR1</i>  |
|               |               |               | <i>GRXCR2</i>  | <i>GRXCR2</i>  |
| <i>GSDME</i>  | <i>GSDME</i>  | <i>GSDME</i>  | <i>GSDME</i>   | <i>GSDME</i>   |
|               |               |               |                | <i>HARS1</i>   |
|               |               |               |                | <i>HARS2</i>   |
| <i>HGF</i>    | <i>HGF</i>    | <i>HGF</i>    | <i>HGF</i>     | <i>HGF</i>     |
|               |               |               |                | <i>HOMER2</i>  |
|               |               |               |                | <i>HOXA2</i>   |
|               |               | <i>HOXB1</i>  | <i>HOXB1</i>   | <i>HOXB1</i>   |
|               |               |               |                | <i>HSD17B4</i> |
| <i>ILDR1</i>  | <i>ILDR1</i>  | <i>ILDR1</i>  | <i>ILDR1</i>   | <i>ILDR1</i>   |
|               |               |               | <i>ISL1</i>    |                |
|               |               |               | <i>KARS1</i>   | <i>KARS1</i>   |
|               |               |               | <i>KCNA10</i>  |                |
|               | <i>KCNE1</i>  | <i>KCNE1</i>  | <i>KCNE1</i>   | <i>KCNE1</i>   |
|               | <i>KCNJ10</i> | <i>KCNJ10</i> | <i>KCNJ10</i>  | <i>KCNJ10</i>  |
|               | <i>KCNQ1</i>  | <i>KCNQ1</i>  | <i>KCNQ1</i>   | <i>KCNQ1</i>   |
| <i>KCNQ4</i>  | <i>KCNQ4</i>  | <i>KCNQ4</i>  | <i>KCNQ4</i>   | <i>KCNQ4</i>   |
|               |               |               | <i>KITLG</i>   | <i>KITLG</i>   |
|               |               |               |                | <i>LARS2</i>   |
| <i>LHFPL5</i> | <i>LHFPL5</i> | <i>LHFPL5</i> | <i>LHFPL5</i>  | <i>LHFPL5</i>  |
| <i>LOXHD1</i> | <i>LOXHD1</i> | <i>LOXHD1</i> | <i>LOXHD1</i>  | <i>LOXHD1</i>  |
|               |               |               | <i>LRIG1</i>   |                |

|                 |                 |                 |                 |                 |
|-----------------|-----------------|-----------------|-----------------|-----------------|
| <i>LRTOMT</i>   | <i>LRTOMT</i>   | <i>LRTOMT</i>   | <i>LRTOMT</i>   | <i>LRTOMT</i>   |
|                 |                 |                 | <i>MACF1</i>    |                 |
|                 |                 |                 | <i>MANBA</i>    | <i>MANBA</i>    |
| <i>MARVELD2</i> | <i>MARVELD2</i> | <i>MARVELD2</i> | <i>MARVELD2</i> | <i>MARVELD2</i> |
|                 |                 |                 |                 | <i>MCM2</i>     |
|                 |                 |                 | <i>MCPH1</i>    |                 |
|                 |                 |                 |                 | <i>MET</i>      |
| <i>MIR96</i>    | <i>MIR96</i>    | <i>MIR96</i>    | <i>MIR96</i>    | <i>MIR96</i>    |
|                 | <i>MITF</i>     | <i>MITF</i>     | <i>MITF</i>     | <i>MITF</i>     |
|                 |                 |                 | <i>MPP1</i>     |                 |
| <i>MSRB3</i>    | <i>MSRB3</i>    | <i>MSRB3</i>    | <i>MSRB3</i>    | <i>MSRB3</i>    |
| <i>MYH14</i>    | <i>MYH14</i>    | <i>MYH14</i>    | <i>MYH14</i>    | <i>MYH14</i>    |
|                 |                 |                 |                 | <i>MYH7B</i>    |
| <i>MYH9</i>     | <i>MYH9</i>     | <i>MYH9</i>     | <i>MYH9</i>     | <i>MYH9</i>     |
| <i>MYO15A</i>   | <i>MYO15A</i>   | <i>MYO15A</i>   | <i>MYO15A</i>   | <i>MYO15A</i>   |
| <i>MYO1A</i>    | <i>MYO1A</i>    | <i>MYO1A</i>    | <i>MYO1A</i>    |                 |
| <i>MYO3A</i>    | <i>MYO3A</i>    | <i>MYO3A</i>    | <i>MYO3A</i>    | <i>MYO3A</i>    |
|                 |                 |                 | <i>MYO3B</i>    | <i>MYO3B</i>    |
| <i>MYO6</i>     | <i>MYO6</i>     | <i>MYO6</i>     | <i>MYO6</i>     | <i>MYO6</i>     |
| <i>MYO7A</i>    | <i>MYO7A</i>    | <i>MYO7A</i>    | <i>MYO7A</i>    | <i>MYO7A</i>    |
|                 |                 |                 |                 | <i>NARS2</i>    |
|                 | <i>NDP</i>      | <i>NDP</i>      | <i>NDP</i>      | <i>NDP</i>      |
|                 |                 |                 | <i>NINL</i>     |                 |
|                 |                 | <i>NLRP3</i>    | <i>NLRP3</i>    | <i>NLRP3</i>    |
|                 |                 |                 | <i>NPTN</i>     | <i>OSBPL2</i>   |
|                 |                 |                 | <i>NRP2</i>     |                 |
| <i>OTOA</i>     | <i>OTOA</i>     | <i>OTOA</i>     | <i>OTOA</i>     | <i>OTOA</i>     |
| <i>OTOF</i>     | <i>OTOF</i>     | <i>OTOF</i>     | <i>OTOF</i>     | <i>OTOF</i>     |
|                 |                 |                 | <i>OTOG</i>     | <i>OTOG</i>     |
|                 |                 | <i>OTOGL</i>    | <i>OTOGL</i>    | <i>OTOGL</i>    |
|                 |                 |                 | <i>OTOL1</i>    |                 |
|                 |                 |                 |                 | <i>P2RX2</i>    |
| <i>PAX3</i>     | <i>PAX3</i>     | <i>PAX3</i>     | <i>PAX3</i>     | <i>PAX3</i>     |
| <i>PCDH15</i>   | <i>PCDH15</i>   | <i>PCDH15</i>   | <i>PCDH15</i>   | <i>PCDH15</i>   |
|                 |                 |                 |                 | <i>PDXDC1</i>   |
| <i>PDZD7</i>    | <i>PDZD7</i>    | <i>PDZD7</i>    | <i>PDZD7</i>    | <i>PDZD7</i>    |
|                 |                 |                 |                 | <i>PEX1</i>     |
|                 |                 |                 |                 | <i>PEX6</i>     |
|                 |                 |                 | <i>PGR</i>      |                 |

|                 |                 |                 |                 |                 |
|-----------------|-----------------|-----------------|-----------------|-----------------|
|                 |                 |                 | <i>PHF20</i>    |                 |
| <i>PJVK</i>     | <i>PJVK</i>     | <i>PJVK</i>     | <i>PJVK</i>     | <i>PJVK</i>     |
|                 |                 |                 |                 | <i>PNPT1</i>    |
|                 |                 |                 | <i>POLR1C</i>   | <i>POLR1C</i>   |
|                 |                 |                 | <i>POLR1D</i>   | <i>POLR1D</i>   |
| <i>POU3F4</i>   | <i>POU3F4</i>   | <i>POU3F4</i>   | <i>POU3F4</i>   | <i>POU3F4</i>   |
| <i>POU4F3</i>   | <i>POU4F3</i>   | <i>POU4F3</i>   | <i>POU4F3</i>   | <i>POU4F3</i>   |
| <i>PRPS1</i>    | <i>PRPS1</i>    | <i>PRPS1</i>    | <i>PRPS1</i>    | <i>PRPS1</i>    |
| <i>PTPRQ</i>    | <i>PTPRQ</i>    | <i>PTPRQ</i>    | <i>PTPRQ</i>    | <i>PTPRQ</i>    |
| <i>RDX</i>      | <i>RDX</i>      | <i>RDX</i>      | <i>RDX</i>      | <i>RDX</i>      |
|                 |                 |                 |                 | <i>RIPOR2</i>   |
|                 |                 |                 |                 | <i>S1PR2</i>    |
|                 |                 |                 |                 | <i>SALL1</i>    |
|                 |                 |                 |                 | <i>SCARB2</i>   |
|                 | <i>SEMA3E</i>   | <i>SEMA3E</i>   | <i>SEMA3E</i>   | <i>SEMA3E</i>   |
|                 |                 |                 | <i>SEMA3F</i>   |                 |
| <i>SERPINB6</i> | <i>SERPINB6</i> | <i>SERPINB6</i> | <i>SERPINB6</i> | <i>SERPINB6</i> |
|                 |                 |                 |                 | <i>SHARPIN</i>  |
|                 | <i>SIX1</i>     | <i>SIX1</i>     | <i>SIX1</i>     | <i>SIX1</i>     |
|                 | <i>SIX5</i>     | <i>SIX5</i>     | <i>SIX5</i>     | <i>SIX5</i>     |
| <i>SLC17A8</i>  | <i>SLC17A8</i>  | <i>SLC17A8</i>  | <i>SLC17A8</i>  | <i>SLC17A8</i>  |
|                 |                 | <i>SLC19A2</i>  | <i>SLC19A2</i>  | <i>SLC19A2</i>  |
|                 |                 |                 | <i>SLC25A21</i> |                 |
| <i>SLC26A4</i>  | <i>SLC26A4</i>  | <i>SLC26A4</i>  | <i>SLC26A4</i>  | <i>SLC26A4</i>  |
| <i>SLC26A5</i>  | <i>SLC26A5</i>  | <i>SLC26A5</i>  | <i>SLC26A5</i>  | <i>SLC26A5</i>  |
|                 |                 |                 |                 | <i>SLC44A4</i>  |
|                 |                 |                 | <i>SLC9A3R1</i> |                 |
|                 |                 |                 | <i>SLC9A3R2</i> |                 |
|                 |                 |                 | <i>SLITRK6</i>  | <i>SLITRK6</i>  |
| <i>SMPX</i>     | <i>SMPX</i>     | <i>SMPX</i>     | <i>SMPX</i>     | <i>SMPX</i>     |
|                 | <i>SNAI2</i>    | <i>SNAI2</i>    | <i>SNAI2</i>    | <i>SNAI2</i>    |
|                 | <i>SOX10</i>    | <i>SOX10</i>    | <i>SOX10</i>    | <i>SOX10</i>    |
|                 |                 |                 |                 | <i>SPATA5</i>   |
|                 |                 |                 | <i>SPNS2</i>    |                 |
|                 |                 |                 | <i>SRRM4</i>    |                 |
| <i>STRC</i>     | <i>STRC</i>     |                 | <i>STRC</i>     | <i>STRC</i>     |
|                 |                 |                 | <i>SUN1</i>     | <i>SUN1</i>     |
|                 |                 |                 |                 | <i>SYNE4</i>    |
|                 |                 |                 |                 | <i>TBC1D24</i>  |

|                |                |                |                |                 |
|----------------|----------------|----------------|----------------|-----------------|
|                |                |                | <i>TBCE</i>    |                 |
|                | <i>TCOF1</i>   | <i>TCOF1</i>   | <i>TCOF1</i>   | <i>TCOF1</i>    |
| <i>TECTA</i>   | <i>TECTA</i>   | <i>TECTA</i>   | <i>TECTA</i>   | <i>TECTA</i>    |
|                |                |                | <i>TECTB</i>   |                 |
|                |                |                | <i>TFAP2A</i>  | <i>TFAP2A</i>   |
| <i>TIMM8A</i>  | <i>TIMM8A</i>  | <i>TIMM8A</i>  | <i>TIMM8A</i>  | <i>TIMM8A</i>   |
| <i>TJP2</i>    | <i>TJP2</i>    | <i>TJP2</i>    | <i>TJP2</i>    | <i>TJP2</i>     |
| <i>TMC1</i>    | <i>TMC1</i>    | <i>TMC1</i>    | <i>TMC1</i>    | <i>TMC1</i>     |
|                |                |                | <i>TMC2</i>    | <i>TMC2</i>     |
|                |                |                |                | <i>TMEM132E</i> |
| <i>TMIE</i>    | <i>TMIE</i>    | <i>TMIE</i>    | <i>TMIE</i>    | <i>TMIE</i>     |
| <i>TMPRSS3</i> | <i>TMPRSS3</i> | <i>TMPRSS3</i> | <i>TMPRSS3</i> | <i>TMPRSS3</i>  |
|                |                |                | <i>TNC</i>     | <i>TNC</i>      |
| <i>TPRN</i>    | <i>TPRN</i>    | <i>TPRN</i>    | <i>TPRN</i>    | <i>TPRN</i>     |
| <i>TRIOBP</i>  | <i>TRIOBP</i>  | <i>TRIOBP</i>  | <i>TRIOBP</i>  | <i>TRIOBP</i>   |
|                |                | <i>TSPEAR</i>  | <i>TSPEAR</i>  | <i>TSPEAR</i>   |
|                |                | <i>TYR</i>     | <i>TYR</i>     | <i>TYR</i>      |
| <i>USH1C</i>   | <i>USH1C</i>   | <i>USH1C</i>   | <i>USH1C</i>   | <i>USH1C</i>    |
| <i>USH1G</i>   | <i>USH1G</i>   | <i>USH1G</i>   | <i>USH1G</i>   | <i>USH1G</i>    |
| <i>USH2A</i>   | <i>USH2A</i>   | <i>USH2A</i>   | <i>USH2A</i>   | <i>USH2A</i>    |
|                |                |                | <i>WBP2</i>    | <i>WBP2</i>     |
| <i>WFS1</i>    | <i>WFS1</i>    | <i>WFS1</i>    | <i>WFS1</i>    | <i>WFS1</i>     |
| <i>WHRN</i>    | <i>WHRN</i>    | <i>WHRN</i>    | <i>WHRN</i>    | <i>WHRN</i>     |
|                |                |                | <i>YWHAE</i>   |                 |
|                |                |                | <i>ZNF614</i>  |                 |

---
