# Supplementary material for: Diagnostic Yield of Targeted Hearing Loss Gene Panel Sequencing in a Large German Cohort With a Balanced Age Distribution from a Single Diagnostic Center: An Eight-year Study
Source: PubMed Central journal article supplement — Ear Hear. 2021 Nov 8;43(3):1049–66. doi: 10.1097/AUD.0000000000001159 (PMC9007094; doi:10.1097/aud.0000000000001159), 2021-11-08
Supplement: aud-43-1049-s002.pdf [file aud-43-1049-s002.pdf]

Diagnostic Yield of Targeted Hearing Loss Gene Panel Sequencing  
in a Large German Cohort with a Balanced Age Distribution  
from a Single Diagnostic Center: An Eight-Year Study

**Supplemental Digital Content 2.**

Transcripts Used for Targeted Gene Panel Design over the study period (2011-2018).

| Gene            | Transcript ID                                                                               |
|-----------------|---------------------------------------------------------------------------------------------|
| <i>ABHD12</i>   | NM_001042472.2, NM_015600.4                                                                 |
| <i>ACTG1</i>    | NM_001199954.2, NM_001614.4                                                                 |
| <i>ACYP2</i>    | NM_001320586.2, NM_138448.3, NM_138448.4                                                    |
| <i>ADCY1</i>    | NM_001281768.1, NM_021116.3                                                                 |
| <i>ADGRV1</i>   | NM_032119.3                                                                                 |
| <i>AIFM1</i>    | NM_001130846.3, NM_004208.3, NM_145812.2                                                    |
| <i>ALMS1</i>    | NM_015120.4                                                                                 |
| <i>ANKH</i>     | NM_054027.5                                                                                 |
| <i>ATOH1</i>    | NM_005172.1                                                                                 |
| <i>ATP2B2</i>   | NM_001001331.3, NM_001330611.2, NM_001683.4                                                 |
| <i>ATP6V1B1</i> | NM_001692.3                                                                                 |
| <i>BCAP31</i>   | NM_001139441.1, NM_001139457.2, NM_001256447.1, NM_005745.7                                 |
| <i>BCS1L</i>    | NM_001079866.1, NM_001257342.1, NM_001257343.1, NM_001257344.1, NM_001320717.1, NM_004328.4 |
| <i>BDP1</i>     | NM_018429.2                                                                                 |
| <i>BSND</i>     | NM_057176.2                                                                                 |
| <i>CABP2</i>    | NM_016366.2                                                                                 |
| <i>CACNA1D</i>  | NM_000720.3, NM_001128839.2, NM_001128840.2                                                 |
| <i>CATSPER2</i> | NM_001282309.2, NM_001282310.2, NM_172095.3                                                 |
| <i>CCDC50</i>   | NM_174908.3, NM_178335.2                                                                    |
| <i>CD151</i>    | NM_001039490.1, NM_004357.4, NM_139029.1, NM_139030.3                                       |
| <i>CD164</i>    | NM_001142401.2, NM_001142402.2, NM_001142403.2, NM_001142404.2, NM_001346500.1, NM_006016.5 |

|                 |                                                                                                          |
|-----------------|----------------------------------------------------------------------------------------------------------|
| <i>CDC14A</i>   | NM_001319210.1, NM_001319211.1, NM_003672.3, NM_033312.2, NM_033313.2                                    |
| <i>CDH23</i>    | NM_001171930.1, NM_001171931.1, NM_001171933.1, NM_001171934.1, NM_001171935.1, NM_022124.5, NM_052836.3 |
| <i>CDKN1C</i>   | NM_000076.2, NM_001122630.1, NM_001122631.1                                                              |
| <i>CEACAM16</i> | NM_001039213.3                                                                                           |
| <i>CELSR1</i>   | NM_014246.1                                                                                              |
| <i>CHD7</i>     | NM_001316690.1, NM_017780.3                                                                              |
| <i>CHSY1</i>    | NM_014918.4                                                                                              |
| <i>CIB2</i>     | NM_001271888.1, NM_001271889.1, NM_006383.3                                                              |
| <i>CISD2</i>    | NM_001008388.4                                                                                           |
| <i>CLDN14</i>   | NM_001146077.1, NM_001146078.2, NM_001146079.1, NM_012130.3, NM_144492.2                                 |
| <i>CLDN9</i>    | NM_020982.3                                                                                              |
| <i>CLIC5</i>    | NM_001114086.1, NM_001256023.1, NM_016929.4                                                              |
| <i>CLPP</i>     | NM_006012.2                                                                                              |
| <i>CLRN1</i>    | NM_001195794.1, NM_052995.2, NM_174878.2                                                                 |
| <i>CLRN3</i>    | NM_152311.4                                                                                              |
| <i>COCH</i>     | NM_001135058.1, NM_001347720.1, NM_004086.2                                                              |
| <i>COL11A1</i>  | NM_001190709.1, NM_001854.3, NM_080629.2, NM_080630.3                                                    |
| <i>COL11A2</i>  | NM_001163771.1, NM_080680.2, NM_080681.2                                                                 |
| <i>COL2A1</i>   | NM_001844.4, NM_033150.2                                                                                 |
| <i>COL4A3</i>   | NM_000091.4                                                                                              |
| <i>COL4A4</i>   | NM_000092.4                                                                                              |
| <i>COL4A5</i>   | NM_000495.4, NM_033380.2                                                                                 |
| <i>COL4A6</i>   | NM_001287758.1, NM_001287759.1, NM_001287760.1, NM_001847.3, NM_033641.3                                 |
| <i>COL9A1</i>   | NM_001851.4, NM_078485.3                                                                                 |
| <i>COL9A2</i>   | NM_001852.3                                                                                              |
| <i>COL9A3</i>   | NM_001853.3                                                                                              |
| <i>CRYM</i>     | NM_001888.4                                                                                              |

*DCDC2* NM\_001195610.1, NM\_016356.4  
*DIABLO* NM\_001278303.1, NM\_001278342.1, NM\_019887.5  
*DIAPH1* NM\_001079812.2, NM\_001314007.1, NM\_005219.4  
*DIAPH3* NM\_001042517.1, NM\_001258366.1, NM\_001258367.1, NM\_001258368.1, NM\_001258369.1,  
NM\_001258370.1, NM\_030932.3  
*DLX5* NM\_005221.5  
*DMXL2* NM\_001174116.1, NM\_001174116.2, NM\_001174117.1, NM\_001174117.2, NM\_015263.3, NM\_015263.4  
*DNMT1* NM\_001130823.2, NM\_001379.3  
*DSPP* NM\_014208.3  
*DUOX2* NM\_001363711.2, NM\_014080.4  
*DZANK1* NM\_001099407.1  
*EDN3* NM\_001302456.1, NM\_207032.2, NM\_207033.2, NM\_207034.2  
*EDNRB* NM\_000115.4, NM\_001122659.2, NM\_001201397.1, NM\_003991.3  
*ELMOD3* NM\_001135021.1, NM\_001135021.2, NM\_001135022.1, NM\_001135022.2, NM\_001135023.1,  
NM\_001135023.2, NM\_001329791.2, NM\_001329792.2, NM\_001329793.2, NM\_032213.4  
*EPS8* NM\_004447.5  
*EPS8L2* NM\_022772.3  
*ESPN* NM\_031475.2  
*ESR1* NM\_000125.3, NM\_001122740.1, NM\_001122741.1, NM\_001122742.1, NM\_001328100.1  
*ESR2* NM\_001040275.1, NM\_001214902.1, NM\_001271876.1, NM\_001271877.1, NM\_001291712.1,  
NM\_001291723.1, NM\_001437.2  
*ESRRB* NM\_004452.3  
*EXOSC2* NM\_001282708.1, NM\_001282709.1, NM\_014285.6  
*EYA1* NM\_000503.5, NM\_001288574.1, NM\_172058.3, NM\_172059.4  
*EYA4* NM\_001301012.1, NM\_001301013.1, NM\_004100.4, NM\_172103.3, NM\_172105.3  
*FAM107B* NM\_001282695.1, NM\_001282696.1, NM\_001282697.1, NM\_001282698.1, NM\_001282699.1,  
NM\_001282700.1, NM\_001282701.1, NM\_001282702.1, NM\_001282703.1, NM\_001320735.1,  
NM\_001320736.1, NM\_001320737.1, NM\_001320738.1, NM\_001320739.1, NM\_001320740.1, NM\_031453.3  
*FGF3* NM\_005247.2

|                |                                                                                                                             |
|----------------|-----------------------------------------------------------------------------------------------------------------------------|
| <i>FOXI1</i>   | NM_012188.4, NM_144769.2                                                                                                    |
| <i>GATA3</i>   | NM_001002295.1, NM_002051.2                                                                                                 |
| <i>GIPC1</i>   | NM_005716.3, NM_202468.2, NM_202469.2, NM_202470.2, NM_202494.2                                                             |
| <i>GIPC3</i>   | NM_133261.2                                                                                                                 |
| <i>GJA1</i>    | NM_000165.4, NM_000165.5                                                                                                    |
| <i>GJB2</i>    | NM_004004.5                                                                                                                 |
| <i>GJB3</i>    | NM_001005752.1, NM_024009.2                                                                                                 |
| <i>GJB4</i>    | NM_153212.2                                                                                                                 |
| <i>GJB6</i>    | NM_001110219.2, NM_001110220.2, NM_001110221.2, NM_006783.4                                                                 |
| <i>GPRASP2</i> | NM_001004051.3, NM_001184874.2, NM_001184875.2, NM_001184876.2, NM_001199818.1, NM_138437.5                                 |
| <i>GPSM2</i>   | NM_001321038.1, NM_001321039.1, NM_013296.4                                                                                 |
| <i>GRHL2</i>   | NM_001330593.1, NM_024915.3                                                                                                 |
| <i>GRXCR1</i>  | NM_001080476.2                                                                                                              |
| <i>GRXCR2</i>  | NM_001080516.1                                                                                                              |
| <i>GSDME</i>   | NM_001127453.1, NM_001127454.1, NM_004403.2                                                                                 |
| <i>HARS1</i>   | NM_001258040.2, NM_001258041.2, NM_001258042.2, NM_001289092.1, NM_001289093.1, NM_002109.5                                 |
| <i>HARS2</i>   | NM_001278731.1, NM_012208.3                                                                                                 |
| <i>HGF</i>     | NM_000601.5, NM_001010931.2, NM_001010932.2, NM_001010933.2, NM_001010934.2                                                 |
| <i>HOMER2</i>  | NM_004839.3, NM_004839.4, NM_199330.2, NM_199330.3                                                                          |
| <i>HOXA2</i>   | NM_006735.3, NM_006735.4                                                                                                    |
| <i>HOXB1</i>   | NM_002144.3                                                                                                                 |
| <i>HSD17B4</i> | NM_000414.3, NM_001199291.2, NM_001199292.1, NM_001292027.1, NM_001292028.1                                                 |
| <i>ILDR1</i>   | NM_001199799.1, NM_001199800.1, NM_175924.3                                                                                 |
| <i>ISL1</i>    | NM_002202.2                                                                                                                 |
| <i>KARS1</i>   | NM_001130089.1, NM_005548.2                                                                                                 |
| <i>KCNA10</i>  | NM_005549.2                                                                                                                 |
| <i>KCNE1</i>   | NM_000219.5, NM_001127668.3, NM_001127669.3, NM_001127670.3, NM_001270402.2, NM_001270403.2, NM_001270404.2, NM_001270405.2 |

|                 |                                                                                                              |
|-----------------|--------------------------------------------------------------------------------------------------------------|
| <i>KCNJ10</i>   | NM_002241.4                                                                                                  |
| <i>KCNQ1</i>    | NM_000218.2                                                                                                  |
| <i>KCNQ4</i>    | NM_004700.3                                                                                                  |
| <i>KITLG</i>    | NM_000899.4, NM_003994.5                                                                                     |
| <i>LARS2</i>    | NM_015340.3                                                                                                  |
| <i>LHFPL5</i>   | NM_182548.3                                                                                                  |
| <i>LOXHD1</i>   | NM_001145472.2, NM_001145473.2, NM_001173129.1, NM_001308013.1, NM_144612.6                                  |
| <i>LRIG1</i>    | NM_015541.2                                                                                                  |
| <i>LRTOMT</i>   | NM_001145307.4, NM_001145308.4, NM_001145310.3, NM_001205138.3, NM_001271471.2, NM_001318803.1, NM_145309.5  |
| <i>MACF1</i>    | NM_012090.5                                                                                                  |
| <i>MANBA</i>    | NM_005908.3                                                                                                  |
| <i>MARVELD2</i> | NM_001038603.2, NM_001244734.1                                                                               |
| <i>MCM2</i>     | NM_004526.3, NM_004526.4                                                                                     |
| <i>MCPH1</i>    | NM_001172574.1, NM_001172575.1, NM_024596.4                                                                  |
| <i>MET</i>      | NM_000245.2, NM_000245.4, NM_001127500.1, NM_001127500.3                                                     |
| <i>MIR96</i>    | NR_029512.1                                                                                                  |
| <i>MITF</i>     | NM_000248.3, NM_001184967.1, NM_001184968.1, NM_006722.2, NM_198158.2, NM_198159.2, NM_198177.2, NM_198178.2 |
| <i>MPP1</i>     | NM_001166461.1, NM_001166462.1, NM_002436.3                                                                  |
| <i>MSRB3</i>    | NM_001031679.2, NM_001193460.1, NM_001193461.1, NM_198080.3                                                  |
| <i>MYH7B</i>    | NM_020884.4, NM_020884.5                                                                                     |
| <i>MYH14</i>    | NM_001077186.1, NM_001145809.1, NM_024729.3                                                                  |
| <i>MYH9</i>     | NM_002473.5                                                                                                  |
| <i>MYO15A</i>   | NM_016239.3                                                                                                  |
| <i>MYO1A</i>    | NM_001256041.1, NM_005379.3                                                                                  |
| <i>MYO3A</i>    | NM_017433.4                                                                                                  |
| <i>MYO3B</i>    | NM_001083615.3, NM_138995.4                                                                                  |

|               |                                                                                                                                                                |
|---------------|----------------------------------------------------------------------------------------------------------------------------------------------------------------|
| <i>MYO6</i>   | NM_001300899.1, NM_004999.3                                                                                                                                    |
| <i>MYO7A</i>  | NM_000260.3, NM_001127180.1                                                                                                                                    |
| <i>NARS2</i>  | NM_001243251.1, NM_024678.5                                                                                                                                    |
| <i>NDP</i>    | NM_000266.3                                                                                                                                                    |
| <i>NINL</i>   | NM_001318226.1, NM_025176.5                                                                                                                                    |
| <i>NLRP3</i>  | NM_001079821.2, NM_001127461.2, NM_001127462.2, NM_004895.4, NM_183395.2                                                                                       |
| <i>NPTN</i>   | NM_001161363.1, NM_001161364.1, NM_012428.3, NM_017455.3                                                                                                       |
| <i>NRP2</i>   | NM_003872.2, NM_018534.3, NM_201264.1, NM_201266.1, NM_201267.1, NM_201279.1                                                                                   |
| <i>OSBPL2</i> | NM_001278649.1, NM_014835.3, NM_144498.2                                                                                                                       |
| <i>OTOA</i>   | NM_001161683.1, NM_144672.3, NM_170664.2                                                                                                                       |
| <i>OTOF</i>   | NM_001287489.1, NM_004802.3, NM_194248.2, NM_194322.2, NM_194323.2                                                                                             |
| <i>OTOG</i>   | NM_001277269.1, NM_001292063.1                                                                                                                                 |
| <i>OTOGL</i>  | NM_173591.3                                                                                                                                                    |
| <i>OTOL1</i>  | NM_001080440.1                                                                                                                                                 |
| <i>P2RX2</i>  | NM_001282164.1, NM_001282165.1, NM_012226.4, NM_016318.3, NM_170682.3, NM_170683.3,<br>NM_174872.2, NM_174873.2                                                |
| <i>PAX3</i>   | NM_000438.5, NM_001127366.2, NM_013942.4, NM_181457.3, NM_181458.3, NM_181459.3, NM_181460.3,<br>NM_181461.3                                                   |
| <i>PCDH15</i> | NM_001142763.1, NM_001142764.1, NM_001142765.1, NM_001142766.1, NM_001142769.2,<br>NM_001142770.2, NM_001142771.1, NM_001142772.1, NM_001142773.1, NM_033056.3 |
| <i>PDXDC1</i> | NM_001285444.1, NM_001285444.2, NM_001285445.1, NM_001285445.2, NM_001285448.1,<br>NM_001285449.1, NM_001285450.2, NM_015027.3, NM_015027.4                    |
| <i>PDZD7</i>  | NM_001195263.1, NM_024895.4                                                                                                                                    |
| <i>PEX1</i>   | NM_000466.2, NM_001282677.1                                                                                                                                    |
| <i>PEX6</i>   | NM_000287.3                                                                                                                                                    |
| <i>PGR</i>    | NM_000926.4, NM_001271162.1                                                                                                                                    |
| <i>PHF20</i>  | NM_016436.4                                                                                                                                                    |
| <i>PJVK</i>   | NM_001042702.4                                                                                                                                                 |
| <i>PNPT1</i>  | NM_033109.4                                                                                                                                                    |

|                 |                                                                                                             |
|-----------------|-------------------------------------------------------------------------------------------------------------|
| <i>POLR1C</i>   | NM_001318876.1, NM_203290.3                                                                                 |
| <i>POLR1D</i>   | NM_001206559.1, NM_015972.3, NM_152705.2                                                                    |
| <i>POU3F4</i>   | NM_000307.4                                                                                                 |
| <i>POU4F3</i>   | NM_002700.2                                                                                                 |
| <i>PRPS1</i>    | NM_001204402.1, NM_002764.3                                                                                 |
| <i>PTPRQ</i>    | NM_001145026.1                                                                                              |
| <i>RDX</i>      | NM_001260492.1, NM_001260493.1, NM_001260494.1, NM_001260495.1, NM_001260496.1, NM_002906.3                 |
| <i>RIPOR2</i>   | NM_001286445.2, NM_001286446.2, NM_001286447.1, NM_001346031.1, NM_001346032.1, NM_014722.4, NM_015864.3    |
| <i>S1PR2</i>    | NM_004230.3                                                                                                 |
| <i>SALL1</i>    | NM_001127892.1, NM_002968.2                                                                                 |
| <i>SCARB2</i>   | NM_001204255.1, NM_001204255.2, NM_005506.3, NM_005506.4                                                    |
| <i>SEMA3E</i>   | NM_001178129.1, NM_012431.2                                                                                 |
| <i>SEMA3F</i>   | NM_001318798.1, NM_001318800.1, NM_004186.4                                                                 |
| <i>SERPINB6</i> | NM_001195291.2, NM_001271823.1, NM_001271824.1, NM_001271825.1, NM_001297699.1, NM_001297700.1, NM_004568.5 |
| <i>SHARPIN</i>  | NM_030974.3, NM_030974.4                                                                                    |
| <i>SIX1</i>     | NM_005982.3                                                                                                 |
| <i>SIX5</i>     | NM_175875.4                                                                                                 |
| <i>SLC17A8</i>  | NM_001145288.1, NM_139319.2                                                                                 |
| <i>SLC19A2</i>  | NM_001319667.1, NM_006996.2                                                                                 |
| <i>SLC25A21</i> | NM_001171170.1, NM_030631.3                                                                                 |
| <i>SLC26A4</i>  | NM_000441.1                                                                                                 |
| <i>SLC26A5</i>  | NM_001167962.1, NM_198999.2, NM_206883.2, NM_206884.2, NM_206885.2                                          |
| <i>SLC44A4</i>  | NM_001178044.1, NM_001178045.1, NM_025257.2, NM_025257.3                                                    |
| <i>SLC9A3R1</i> | NM_004252.4                                                                                                 |
| <i>SLC9A3R2</i> | NM_001130012.2, NM_001252073.1, NM_004785.5                                                                 |
| <i>SLITRK6</i>  | NM_032229.2                                                                                                 |

|                 |                                                                             |
|-----------------|-----------------------------------------------------------------------------|
| <i>SMPX</i>     | NM_014332.2                                                                 |
| <i>SNAI2</i>    | NM_003068.4                                                                 |
| <i>SOX10</i>    | NM_006941.3                                                                 |
| <i>SPATA5</i>   | NM_145207.2                                                                 |
| <i>SPNS2</i>    | NM_001124758.2                                                              |
| <i>SRRM4</i>    | NM_194286.3                                                                 |
| <i>STRC</i>     | NM_153700.2                                                                 |
| <i>SUN1</i>     | NM_001130965.2, NM_001171944.1, NM_001171945.1, NM_001171946.1, NM_025154.5 |
| <i>SYNE4</i>    | NM_001039876.2, NM_001297735.2                                              |
| <i>TBC1D24</i>  | NM_001199107.1, NM_020705.2                                                 |
| <i>TBCE</i>     | NM_001079515.2, NM_001287801.1, NM_001287802.1, NM_003193.4                 |
| <i>TCOF1</i>    | NM_000356.3, NM_001008657.2, NM_001135243.1, NM_001135244.1, NM_001135245.1 |
| <i>TECTA</i>    | NM_005422.2                                                                 |
| <i>TECTB</i>    | NM_058222.2                                                                 |
| <i>TFAP2A</i>   | NM_001032280.2, NM_001042425.1, NM_003220.2                                 |
| <i>TIMM8A</i>   | NM_001145951.1, NM_004085.3                                                 |
| <i>TJP2</i>     | NM_001170414.2, NM_001170415.1, NM_001170416.1, NM_004817.4, NM_201629.3    |
| <i>TMC1</i>     | NM_138691.2                                                                 |
| <i>TMC2</i>     | NM_080751.2                                                                 |
| <i>TMEM132E</i> | NM_001304438.1                                                              |
| <i>TMIE</i>     | NM_147196.2                                                                 |
| <i>TMPRSS3</i>  | NM_001256317.1, NM_024022.2, NM_032405.1                                    |
| <i>TNC</i>      | NM_002160.3                                                                 |
| <i>TPRN</i>     | NM_001128228.2                                                              |
| <i>TRIOBP</i>   | NM_001039141.2, NM_007032.5, NM_138632.2                                    |
| <i>TSPEAR</i>   | NM_144991.2                                                                 |
| <i>TWNK</i>     | NM_001163812.1, NM_001163813.1, NM_001163814.1, NM_021830.4                 |
| <i>TYR</i>      | NM_000372.4                                                                 |



|               |                                             |
|---------------|---------------------------------------------|
| <i>USH1C</i>  | NM_001297764.1, NM_005709.3, NM_153676.3    |
| <i>USH1G</i>  | NM_173477.4                                 |
| <i>USH2A</i>  | NM_007123.5, NM_206933.2                    |
| <i>WBP2</i>   | NM_001330499.1, NM_001348170.1, NM_012478.3 |
| <i>WFS1</i>   | NM_001145853.1, NM_006005.3                 |
| <i>WHRN</i>   | NM_001083885.2, NM_001346890.1, NM_015404.3 |
| <i>YWHAE</i>  | NM_006761.4                                 |
| <i>ZNF614</i> | NM_025040.3                                 |

---
