# Supplementary material for: Diagnostic Yield of Targeted Hearing Loss Gene Panel Sequencing in a Large German Cohort With a Balanced Age Distribution from a Single Diagnostic Center: An Eight-year Study
Source: PubMed Central journal article supplement — Ear Hear. 2021 Nov 8;43(3):1049–66. doi: 10.1097/AUD.0000000000001159 (PMC9007094; doi:10.1097/aud.0000000000001159), 2021-11-08
Supplement: aud-43-1049-s004.pdf [file aud-43-1049-s004.pdf]

Diagnostic Yield of Targeted Hearing Loss Gene Panel Sequencing  
in a Large German Cohort with a Balanced Age Distribution  
from a Single Diagnostic Center: An Eight-Year Study

**Supplemental Digital Content 4.**

Table including all Genetic Variants of Genetically Diagnosed Patients Undergoing Targeted Gene Analysis (in alphabetical order).

| ID   | Gene transcript                | Variant 1 (protein change 1)  | Variant type    | Variant 2 (protein change 2)  | Variant type | Zyg | Clin Var | DVD | ACMG/AMP | ACMG/AMP rules applied                                                                                                                          | Seg |
|------|--------------------------------|-------------------------------|-----------------|-------------------------------|--------------|-----|----------|-----|----------|-------------------------------------------------------------------------------------------------------------------------------------------------|-----|
| 25   | <i>ACTG1</i><br>NM_001199954.1 | c.721G>A<br>(p.(Glu241Lys))   | Missense        | -                             |              | Het | LP       | P   | LP       | PS1_Strong,<br>PM2_Moderate,<br>PP3_Supporting                                                                                                  | ND  |
| 39   | <i>CDH23</i><br>NM_022124.5    | c.3215C>A<br>(p.(Ala1072Asp)) | Missense        | c.3215C>A<br>(p.(Ala1072Asp)) | Missense     | Hom | US       | P   | LP; LP   | PS1_Supporting,<br>PM2_Moderate,<br>PM3_Supporting,<br>PP3_Supporting;<br>PS1_Supporting,<br>PM2_Moderate,<br>PM3_Supporting,<br>PP3_Supporting | ND  |
| 286  | <i>COCH</i><br>NM_001347720.1  | c.346C>T<br>(p.(Pro116Ser))   | Missense        | -                             |              | Het | P        | P   | LP       | PS1_Strong,<br>PM2_Moderate,<br>PP3_Supporting                                                                                                  | ND  |
| 262* | <i>COL11A1</i><br>NM_080629.2  | c.652-1G>C<br>(p.?)           | Splice acceptor | -                             |              | Het | LP       | LP  | LP       | PS2_Supporting,<br>PS3_Supporting,<br>PM2_Moderate;<br>PP1_Supporting,<br>PP3_Supporting                                                        | Yes |
| 58   | <i>COL11A1</i><br>NM_080629.2  | c.2644C>T<br>(p.(Arg882Trp))  | Missense        | -                             |              | Het | NL       | US  | LP       | PM2_Moderate,<br>PP3_Strong                                                                                                                     | ND  |
| 67   | <i>COL11A1</i><br>NM_080630.3  | c.2930G>C<br>(p.(Gly977Ala))  | Missense        | -                             |              | Het | NL       | NL  | LP       | PM1_Moderate,<br>PM2_Moderate,<br>PP3_Strong                                                                                                    | ND  |
| 273  | <i>COL11A1</i><br>NM_080629.2  | c.4338+2T>C<br>(p.?)          | Splice donor    | -                             |              | Het | LP       | NL  | LP       | PS2_Supporting,<br>PS3_Supporting,<br>PM2_Moderate,<br>PP1_Supporting,<br>PP3_Supporting                                                        | Yes |

|     |                                     |                                        |                                |                            |                |      |                 |           |        |                                                               |     |
|-----|-------------------------------------|----------------------------------------|--------------------------------|----------------------------|----------------|------|-----------------|-----------|--------|---------------------------------------------------------------|-----|
| 56  | <i>COL2A1</i><br>NM_001844.4        | c.1364C>T<br>(p.(Thr455Met))           | Missense<br>& splice<br>region | -                          |                | Het  | NL              | P         | LP     | PP1_Moderate,<br>PP3_Strong,<br>BS2_Strong                    | Yes |
| 255 | <i>COL4A3</i><br>NM_080630.3        | c.4421T>C<br>(p.(Leu474Pro))           | Missense                       | -                          |                | Het  | C               | P         | LP     | PS1_Strong,<br>PM2_Moderate,<br>PP3_Supporting                | ND  |
| 270 | <i>COL4A3</i><br>NM_000091.3        | c.4421T>C<br>(p.(Leu474Pro))           | Missense                       | -                          |                | Het  | C               | P         | LP     | PS1_Strong,<br>PM2_Moderate,<br>PP3_Supporting                | ND  |
| 32  | <i>COL4A3</i><br>NM_000091.3        | c.4882T>G<br>(p.(Ser1628Ala))          | Missense                       | -                          |                | Het  | US              | US        | P      | PM2_Moderate,<br>PP1_Strong,<br>PP4_Strong                    | Yes |
| 214 | <i>COL4A5</i><br>NM_033380.2        | c.4706G>A<br>(p.(Arg1569Gln))          | Missense<br>& splice<br>region | -                          |                | Hemi | P               | P         | LP     | PVS1_Strong,<br>PM2_Moderate,<br>PP4_Moderate                 | ND  |
| 230 | <i>COL9A2</i><br>NM_001852.3        | c.1510C>T<br>(p.(Arg540*))             | Stop<br>gained                 | c.1510C>T<br>(p.(Arg540*)) | Stop<br>gained | Hom  | NL,<br>NL       | US,<br>US | LP; LP | PVS1_Strong,<br>PM2_Moderate;<br>PVS1_Strong,<br>PM2_Moderate | ND  |
| 279 | <i>DIAPH1</i><br>NM_005219.4        | c.3268dup<br>(p.(Met1090Asnfs*<br>13)) | Frameshift                     | -                          |                | Het  | LP              | LP        | LP     | PVS1_Strong,<br>PM2_Moderate                                  | ND  |
| 277 | <i>DIAPH3</i><br>NM_0010425<br>17.1 | c.2266-2A>G<br>(p.?)                   | Splice<br>acceptor             | -                          |                | Het  | US              | US        | LP     | PVS1_Strong,<br>PM2_Moderate                                  | ND  |
| 127 | <i>EDNRB</i><br>NM_0012013<br>97.1  | c.18T>A<br>(p.(Cys6*))                 | Stop<br>gained                 | -                          |                | Het  | NL <sup>#</sup> | US        | LP     | PVS1_Strong,<br>PM2_Moderate,<br>PP4_Supporting               | ND  |
| 247 | <i>EDNRB</i><br>NM_000115.4         | c.878dup<br>(p.(Tyr293*))              | Nonsense                       | -                          |                | Het  | LP              | NL        | LP     | PVS1_Strong,<br>PM2_Moderate                                  | ND  |
| 120 | <i>EYA4</i><br>NM_0013010<br>13.1   | c.1481dup<br>(p.(Glu496Argfs*4))       | Frameshift                     | -                          |                | Het  | NL              | NL        | LP     | PVS1_Strong,<br>PM2_Moderate                                  | ND  |
| 224 | <i>GATA3</i><br>NM_0010022<br>95.1  | c.153dup<br>(p.(Asn52*))               | Nonsense                       | -                          |                | Het  | NL              | NL        | LP     | PVS1_Strong,<br>PM2_Moderate                                  | ND  |

|                  |                            |                               |              |                                     |              |          |       |      |       |                                                                                                                   |     |
|------------------|----------------------------|-------------------------------|--------------|-------------------------------------|--------------|----------|-------|------|-------|-------------------------------------------------------------------------------------------------------------------|-----|
| 315 <sup>§</sup> | <i>GJB2</i><br>NM_004004.5 | c.-23+1G>A<br>(p.?)           | Splice donor | c.-23+1G>A<br>(p.?)                 | Splice donor | Hom      | P, P  | P, P | P; P  | PVS1_Strong,<br>PS3_Strong,<br>PP3_Supporting;<br>PVS1_Strong,<br>PS3_Strong,<br>PP3_Supporting                   | ND  |
| 290              | <i>GJB2</i><br>NM_004004.5 | c.35del<br>(p.(Gly12Valfs*2)) | Frameshift   | c.35del<br>(p.(Gly12Valfs*2))       | Frameshift   | Hom      | P, P, | P, P | P; P  | PVS1_Strong,<br>PS3_Strong;<br>PVS1_Strong,<br>PS3_Strong                                                         | ND  |
| 296 <sup>§</sup> | <i>GJB2</i><br>NM_004004.5 | c.35del<br>(p.(Gly12Valfs*2)) | Frameshift   | c.35del<br>(p.(Gly12Valfs*2))       | Frameshift   | Hom      | P, P  | P, P | P; P  | PVS1_Strong,<br>PS3_Strong;<br>PVS1_Strong,<br>PS3_Strong                                                         | ND  |
| 297 <sup>§</sup> | <i>GJB2</i><br>NM_004004.5 | c.35del<br>(p.(Gly12Valfs*2)) | Frameshift   | c.35del<br>(p.(Gly12Valfs*2))       | Frameshift   | Hom      | P, P  | P, P | P; P  | PVS1_Strong,<br>PS3_Strong;<br>PVS1_Strong,<br>PS3_Strong                                                         | ND  |
| 298 <sup>§</sup> | <i>GJB2</i><br>NM_004004.5 | c.35del<br>(p.(Gly12Valfs*2)) | Frameshift   | c.35del<br>(p.(Gly12Valfs*2))       | Frameshift   | Hom      | P, P  | P, P | P; P  | PVS1_Strong,<br>PS3_Strong;<br>PVS1_Strong,<br>PS3_Strong                                                         | ND  |
| 304 <sup>§</sup> | <i>GJB2</i><br>NM_004004.5 | c.35del<br>(p.(Gly12Valfs*2)) | Frameshift   | c.139G>T<br>(p.(Glu47*))            | Stop gained  | Comp het | P, P  | P, P | P; P  | PVS1_Strong,<br>PS3_Strong;<br>PVS1_Strong,<br>PS1_Strong,<br>PM2_Moderate,<br>PM3_Moderate,<br>PM5_Moderate      | ND  |
| 305 <sup>§</sup> | <i>GJB2</i><br>NM_004004.5 | c.35del<br>(p.(Gly12Valfs*2)) | Frameshift   | c.313_326del<br>(p.(Lys105Glyfs*5)) | Frameshift   | Comp het | P, P  | P, P | P; LP | PVS1_Strong,<br>PS3_Strong;<br>PVS1_Strong,<br>PM2_Moderate,<br>PM3_Moderate                                      | Yes |
| 306 <sup>§</sup> | <i>GJB2</i><br>NM_004004.5 | c.35del<br>(p.(Gly12Valfs*2)) | Frameshift   | c.269T>C<br>(p.(Leu90Pro))          | Missense     | Comp het | P, P  | P, P | P; P  | PVS1_Strong,<br>PS3_Strong;<br>PS1_Strong,<br>PM2_Moderate,<br>PM3_Supporting,<br>PM5_Moderate,<br>PP3_Supporting | ND  |

|                  |                            |                               |                |                                     |                |             |       |      |       |                                                                                                                                       |     |
|------------------|----------------------------|-------------------------------|----------------|-------------------------------------|----------------|-------------|-------|------|-------|---------------------------------------------------------------------------------------------------------------------------------------|-----|
| 307 <sup>§</sup> | <i>GJB2</i><br>NM_004004.5 | c.35del<br>(p.(Gly12Valfs*2)) | Frameshift     | c.139G>T<br>(p.(Glu47*))            | Stop<br>gained | Comp<br>het | P, P  | P, P | P; P  | PVS1_Strong,<br>PS3_Strong;<br>PVS1_Strong,<br>PS1_Strong,<br>PM2_Moderate,<br>PM3_Moderate,<br>PM5_Moderate                          | Yes |
| 308 <sup>§</sup> | <i>GJB2</i><br>NM_004004.5 | c.35del<br>(p.(Gly12Valfs*2)) | Frameshift     | c.35del<br>(p.(Gly12Valfs*2))       | Frameshift     | Hom         | P, P, | P, P | P; P  | PVS1_Strong,<br>PS3_Strong;<br>PVS1_Strong,<br>PS3_Strong                                                                             | ND  |
| 309 <sup>§</sup> | <i>GJB2</i><br>NM_004004.5 | c.35del<br>(p.(Gly12Valfs*2)) | Frameshift     | c.35del<br>(p.(Gly12Valfs*2))       | Frameshift     | Hom         | P, P, | P, P | P; P  | PVS1_Strong,<br>PS3_Strong;<br>PVS1_Strong,<br>PS3_Strong                                                                             | Yes |
| 310 <sup>§</sup> | <i>GJB2</i><br>NM_004004.5 | c.35del<br>(p.(Gly12Valfs*2)) | Frameshift     | c.35del<br>(p.(Gly12Valfs*2))       | Frameshift     | Hom         | P, P, | P, P | P; P  | PVS1_Strong,<br>PS3_Strong;<br>PVS1_Strong,<br>PS3_Strong                                                                             | ND  |
| 311 <sup>§</sup> | <i>GJB2</i><br>NM_004004.5 | c.35del<br>(p.(Gly12Valfs*2)) | Frameshift     | c.313_326del<br>(p.(Lys105Glyfs*5)) | Frameshift     | Comp<br>het | P, P  | P, P | P; LP | PVS1_Strong,<br>PS3_Strong;<br>PVS1_Strong,<br>PM2_Moderate,<br>PM3_Moderate                                                          | ND  |
| 314 <sup>§</sup> | <i>GJB2</i><br>NM_004004.5 | c.35del<br>(p.(Gly12Valfs*2)) | Frameshift     | c.35del<br>(p.(Gly12Valfs*2))       | Frameshift     | Hom         | P, P, | P, P | P; P  | PVS1_Strong,<br>PS3_Strong;<br>PVS1_Strong,<br>PS3_Strong                                                                             | ND  |
| 90               | <i>GJB2</i><br>NM_004004.5 | c.71G>A<br>(p.(Trp24*))       | Stop<br>gained | c.71G>A<br>(p.(Trp24*))             | Stop<br>gained | Hom         | P, P  | P, P | P; P  | PVS1_Strong,<br>PS3_Moderate,<br>PM2_Moderate,<br>PM3_Moderate;<br>PVS1_Strong,<br>PS3_Moderate,<br>PM2_Moderate,<br>PM3_Moderate     | ND  |
| 302 <sup>§</sup> | <i>GJB2</i><br>NM_004004.5 | c.71G>A<br>(p.(Trp24*))       | Stop<br>gained | c.71G>A<br>(p.(Trp24*))             | Stop<br>gained | Hom         | P, P  | P, P | P; P  | PVS1_Strong,<br>PS3_Moderate,<br>PM2_Moderate,<br>PP1_Supporting;<br>PVS1_Strong,<br>PS3_Moderate,<br>PM2_Moderate,<br>PP1_Supporting | Yes |

|                    |                              |                                       |                 |                                      |                |             |           |           |        |                                                                                                                                                   |     |
|--------------------|------------------------------|---------------------------------------|-----------------|--------------------------------------|----------------|-------------|-----------|-----------|--------|---------------------------------------------------------------------------------------------------------------------------------------------------|-----|
| 312* <sup>\$</sup> | <i>GJB2</i><br>NM_004004.5   | c.71G>A<br>(p.(Trp24*))               | Stop<br>gained  | c.71G>A<br>(p.(Trp24*))              | Stop<br>gained | Hom         | P, P      | P, P      | P; P   | PVS1_Strong,<br>PS3_Moderate,<br>PM2_Moderate,<br>PM3_Moderate;<br>PVS1_Strong,<br>PS3_Moderate,<br>PM2_Moderate,<br>PM3_Moderate                 | Yes |
| 294 <sup>\$</sup>  | <i>GJB2</i><br>NM_004004.5   | c.109G>A<br>(p.(Val37Ile))            | Missense        | c.109G>A<br>(p.(Val37Ile))           | Missense       | Hom         | P, P      | P, P      | P; P   | PS1_Very strong,<br>PM3_Supporting,<br>PM5_Moderate,<br>PP3_Supporting;<br>PS1_Very strong,<br>PM3_Supporting,<br>PM5_Moderate,<br>PP3_Supporting | ND  |
| 287                | <i>GJB2</i><br>NM_004004.5   | c.269T>C<br>(p.(Leu90Pro))            | Missense        | c.269T>C<br>(p.(Leu90Pro))           | Missense       | Hom         | P, P      | P, P      | P; P   | PS1_Strong,<br>PM2_Moderate,<br>PM3_Supporting,<br>PM5_Moderate,<br>PP3_Supporting;                                                               | ND  |
| 211                | <i>KCNQ4</i><br>NM_004700.3  | c.1251del<br>(p.(Cys418Alafs*78)<br>) | Frameshift      | -                                    |                | Het         | NL        | NL        | LP     | PP3_Supporting<br>PVS1_Strong,<br>PM2_Moderate                                                                                                    | ND  |
| 115*               | <i>LOXHD1</i><br>NM_144612.6 | c.1904T>C<br>(p.(Leu635Pro))          | Missense        | c.2314A>T<br>(p.(Ile772Phe))         | Missense       | Comp<br>het | NL,<br>NL | LP, LP    | LP; LP | PM2_Supporting,<br>PM5_Moderate,<br>PP1_Moderate,<br>PP3_Supporting;<br>PM2_Moderate,<br>PM3_Moderate,<br>PP1_Moderate,<br>PP3_Supporting         | Yes |
| 59                 | <i>LOXHD1</i><br>NM_144612.6 | c.3061+1G>A<br>(p.?)                  | Splice<br>donor | c.5144del<br>(p.(Asn1715Thrfs*4<br>) | Frameshift     | Comp<br>het | P, NL     | US,<br>US | LP; LP | PVS1_Strong,<br>PM2_Moderate;<br>PVS1_Strong,<br>PM2_Moderate                                                                                     | ND  |

|      |                                       |                                          |                    |                               |                 |             |           |           |        |                                                                                                                                                                                         |     |
|------|---------------------------------------|------------------------------------------|--------------------|-------------------------------|-----------------|-------------|-----------|-----------|--------|-----------------------------------------------------------------------------------------------------------------------------------------------------------------------------------------|-----|
| 89   | <i>LOXHD1</i><br>NM_144612.6          | c.5721T>A<br>(p.(Tyr1907*))              | Nonsense           | c.5721T>A<br>(p.(Tyr1907*))   | Nonsense        | Hom         | NL,<br>NL | US,<br>US | LP; LP | PVS1_Strong,<br>PM2_Moderate,<br>BP4_Supporting;<br>PVS1_Strong,<br>PM2_Moderate,<br>BP4_Supporting                                                                                     | ND  |
| 246  | <i>MANBA</i><br>NM_005908.3           | c.1236G>A<br>(p.(Trp412*))               | Stop<br>gained     | c.1236G>A<br>(p.(Trp412*))    | Stop<br>gained  | Hom         | LP, LP    | LP, LP    | LP; LP | PVS1_Strong,<br>PM2_Moderate;<br>PVS1_Strong,<br>PM2_Moderate                                                                                                                           | ND  |
| 257  | <i>MARVELD2</i><br>NM_0010386<br>03.2 | c.880_890del<br>(p.(Phe294Argfs*17<br>)) | Frameshift         | c.1331+2T>C<br>(p.?)          | Splice<br>donor | Comp<br>het | LP, LP    | LP, P     | LP; LP | PVS1_Strong,<br>PM2_Moderate,<br>PM3_Supporting;<br>PVS1_Strong,<br>PM2_Moderate,<br>PM3_Supporting                                                                                     | Yes |
| 259  | <i>MITF</i><br>NM_0013546<br>04.1     | c.1180-2A>G<br>(p.?)                     | Splice<br>acceptor | -                             |                 | Het         | LP        | LP        | LP     | PVS1_Strong,<br>PM2_Moderate                                                                                                                                                            | ND  |
| 23   | <i>MYO15A</i><br>NM_016239.3          | c.1137del<br>(p.(Tyr380Metfs*64<br>))    | Frameshift         | c.8183G>A<br>(p.(Arg2728His)) | Missense        | Comp<br>het | P, LP     | P, P      | P; P   | PVS1_Very strong,<br>PS1_Strong,<br>PM2_Supporting,<br>PP1_Supporting;<br>PS1_Strong,<br>PM2_Moderate,<br>PM3_Moderate,<br>PP3_Supporting                                               | ND  |
| 140  | <i>MYO15A</i><br>NM_016239.3          | c.1137del<br>(p.(Tyr380Metfs*64<br>))    | Frameshift         | c.2677C>T<br>(p.(Arg893*))    | Stop<br>gained  | Comp<br>het | P, NL     | P, US     | P; LP  | PVS1_Very strong,<br>PS1_Strong,<br>PM2_Supporting,<br>PM3_Moderate,<br>PP1_Supporting;<br>PVS1_Strong,<br>PM2_Moderate,<br>PM3_Moderate,<br>PP1_Supporting                             | Yes |
| 289* | <i>MYO15A</i><br>NM_016239.3          | c.4351G>A<br>(p.(Asp1451Asn))            | Missense           | c.4351G>A<br>(p.(Asp1451Asn)) | Missense        | Hom         | P, P      | P, P      | P; P   | PS1_Very strong,<br>PM2_Moderate,<br>PM3_Supporting,<br>PP1_Supporting,<br>PP3_Supporting;<br>PS1_Very strong,<br>PM2_Moderate,<br>PM3_Supporting,<br>PP1_Supporting,<br>PP3_Supporting | Yes |

|                  |                               |                                      |            |                               |          |             |                 |           |        |                                                                                                                                              |     |
|------------------|-------------------------------|--------------------------------------|------------|-------------------------------|----------|-------------|-----------------|-----------|--------|----------------------------------------------------------------------------------------------------------------------------------------------|-----|
| 99               | <i>MYO15A</i><br>NM_016239.3  | c.9620G>T<br>(p.(Arg3207Arg))        | Missense   | c.9620G>T<br>(p.(Arg3207Arg)) | Missense | Hom         | LP, LP          | NL,<br>NL | LP; LP | PM2_Moderate,<br>PM3_Supporting,<br>PM5_Strong,<br>PP3_Supporting;<br>PM2_Moderate,<br>PM3_Supporting,<br>PM5_Strong,<br>PP3_Supporting      | ND  |
| 181              | <i>MYO6</i><br>NM_004999.3    | c.866_869del<br>(p.(Lys289Argfs*17)) | Frameshift | -                             |          | Het         | NL <sup>#</sup> | P         | LP     | PVS1_Strong,<br>PM2_Moderate                                                                                                                 | ND  |
| 68               | <i>MYO6</i><br>NM_004999.3    | c.2397C>A<br>(p.(Cys799*))           | Nonsense   | -                             |          | Het         | NL              | NL        | LP     | PVS1_Strong,<br>PM2_Moderate                                                                                                                 | ND  |
| 112              | <i>MYO7A</i><br>NM_000260.3   | c.1211G>A<br>(p.(Gly404Glu))         | Missense   | -                             |          | Het         | NL <sup>#</sup> | NL        | LP     | PM2_Strong,<br>PP1_Moderate,<br>PP3_Supporting                                                                                               | Yes |
| 299 <sup>s</sup> | <i>OTOF</i><br>NM_194248.2    | c.2719C>T<br>(p.(Gln907*))           | Nonsense   | c.5203C>T<br>(p.(Arg1735Trp)) | Missense | Comp<br>het | NL <sup>#</sup> | NL        | LP; LP | PVS1_Strong,<br>PM2_Moderate,<br>PM3_Moderate;<br>PS1_Strong,<br>PM2_Moderate,<br>PM5_Moderate,<br>PP3_Supporting                            | Yes |
| 51               | <i>PAX3</i><br>NM_181459.3    | c.167G>T<br>(p.(Arg56Leu))           | Frameshift | -                             |          | Het         | P               | P         | LP     | PS1_Moderate,<br>PM2_Moderate,<br>PM5_Moderate,<br>PP3_Supporting                                                                            | ND  |
| 172              | <i>POU4F3</i><br>NM_002700.2  | c.545C>G<br>(p.(Ser182*))            | Nonsense   | -                             |          | Het         | NL              | NL        | LP     | PVS1_Strong,<br>PM2_Moderate                                                                                                                 | ND  |
| 74               | <i>SLC26A4</i><br>NM_000441.1 | c.703C>T<br>(p.(Gln235*))            | Nonsense   | c.1280C>A<br>(p.(Ser427Tyr))  | Missense | Comp<br>het | NL,<br>NL       | NL,<br>NL | P; LP  | PVS1_Strong,<br>PM2_Moderate,<br>PM3_Supporting,<br>PP4_Supporting;<br>PM2_Moderate,<br>PM3_Supporting,<br>PP3_Supporting,<br>PP4_Supporting | ND  |
| 278              | <i>SLC26A4</i><br>NM_000441.1 | c.707T>C<br>(p.(Leu236Pro))          | Missense   | c.2145G>T<br>(p.(Lys715Asn))  | Missense | Comp<br>het | P, LP           | P, P      | LP; LP | PS1_Strong,<br>PM2_Supporting,<br>PM5_Moderate,<br>PP3_Supporting;<br>PS1_Strong,<br>PM2_Supporting,<br>BP4_Supporting                       | ND  |

|                  |                               |                                  |                            |                              |                  |          |           |           |        |                                                                                                                                                      |     |
|------------------|-------------------------------|----------------------------------|----------------------------|------------------------------|------------------|----------|-----------|-----------|--------|------------------------------------------------------------------------------------------------------------------------------------------------------|-----|
| 300 <sup>s</sup> | <i>SLC26A4</i><br>NM_000441.1 | c.918+1G>T<br>(p.?)              | Splice donor               | c.1001+1G>A<br>(p.?)         | Splice donor     | Comp het | LP, P     | LP, P     | P; P   | PVS1_Strong,<br>PS1_Strong,<br>PM2_Moderate,<br>PP4_Supporting;<br>PVS1_Strong,<br>PS1_Strong,<br>PM2_Supporting,<br>PM3_Moderate,<br>PP4_Supporting | ND  |
| 65               | <i>SLC26A4</i><br>NM_000441.1 | c.1001+1G>A<br>(p.?)             | Splice donor               | c.2219G>T<br>(p.(Gly740Val)) | Missense         | Comp het | P, US     | P, P      | P; LP  | PVS1_Strong,<br>PM2_Supporting,<br>PM3_Moderate,<br>PP4_Supporting;<br>PM2_Supporting,<br>PM3_Moderate,<br>PP4_Supporting                            | ND  |
| 41               | <i>SMPX</i><br>NM_014332.2    | c.140del<br>(p.(Pro47Leufs*34))  | Frameshift                 | -                            | -                | Hemi     | NL        | NL        | LP     | PVS1_Strong,<br>PM2_Moderate                                                                                                                         | ND  |
| 88               | <i>SOX10</i><br>NM_006941.3   | c.570C>A<br>(p.(Cys190*))        | Stop gained                | -                            | -                | Het      | NL        | P         | P      | PVS1_Strong,<br>PM2_Moderate,<br>PP4_Supporting                                                                                                      | ND  |
| 86               | <i>STRC</i><br>NM_153700.2    | c.(?_3499)_<br>(4993_?)del       | Partial deletion           | c.(?_3499)_<br>(4993_?)del   | Partial deletion | Hom      | P, P      | NL,<br>NL | P; P   | N/A                                                                                                                                                  | ND  |
| 250              | <i>TECTA</i><br>NM_005422.2   | c.2359del<br>(p.(Glu787LysfsX4)) | Frameshift                 | -                            | -                | Het      | LP        | LP        | LP     | PVS1_Strong,<br>PM2_Moderate                                                                                                                         | ND  |
| 206              | <i>TECTA</i><br>NM_005422.2   | c.2785del<br>(p.(Val929Trpfs*2)) | Frameshift                 | c.2367G>A<br>(p.(Lys789=))   | Synonymous       | Comp het | NL,<br>NL | NL,<br>NL | LP; LP | PVS1_Strong,<br>PM2_Moderate;<br>PVS1_Strong,<br>PM2_Moderate                                                                                        | ND  |
| 202              | <i>TFAP2A</i><br>NM_003220.2  | c.9G>A<br>(p.(Trp3*))            | Nonsense                   | -                            | -                | Het      | NL        | NL        | LP     | PVS1_Strong,<br>PM2_Moderate                                                                                                                         | ND  |
| 265              | <i>TMIE</i><br>NM_147196.2    | c.250C>T<br>(p.(Arg84Trp))       | Missense                   | c.250C>T<br>(p.(Arg84Trp))   | Missense         | Hom      | P, P      | P, P      | LP; LP | PS1_Moderate,<br>PM2_Moderate,<br>PM5_Moderate,<br>PP3_Supporting;<br>PS1_Moderate,<br>PM2_Moderate,<br>PM5_Moderate,<br>PP3_Supporting              | Yes |
| 83*              | <i>TMPRSS3</i><br>NM_024022.2 | c.208del<br>(p.(His70Thrfs*19))  | Frameshift & splice region | c.413C>A<br>(p.(Ala138Glu))  | Missense         | Comp het | P, P      | P, P      | LP; LP | PVS1_Strong,<br>PM2_Supporting,<br>PM5_Moderate;<br>PS1_Strong,<br>PM2_Moderate,<br>PP3_Supporting                                                   | ND  |



|      |                                   |                              |                 |                             |                 |             |       |       |        |                                                                                                                                   |     |
|------|-----------------------------------|------------------------------|-----------------|-----------------------------|-----------------|-------------|-------|-------|--------|-----------------------------------------------------------------------------------------------------------------------------------|-----|
| 288  | <i>TMPRSS3</i><br>NM_024022.2     | c.316C>T<br>(p.(Arg106Cys))  | Missense        | c.413C>A<br>(p.(Ala138Glu)) | Missense        | Comp<br>het | LP, P | P, P  | LP; LP | PS1_Strong,<br>PM2_Supporting,<br>PP3_Supporting;<br>PS1_Strong,<br>PM1_Moderate,<br>PP3_Supporting                               | ND  |
| 55   | <i>TMPRSS3</i><br>NM_024022.2     | c.413C>A<br>(p.(Ala138Glu))  | Missense        | c.965C>A<br>(p.(Pro322His)) | Missense        | Comp<br>het | P, NL | P, NL | LP; LP | PS1_Strong,<br>PM2_Moderate,<br>PP3_Supporting;<br>PM2_Moderate,<br>PM3_Moderate,<br>PP3_Moderate                                 | ND  |
| 271  | <i>USH2A</i><br>NM_206933.2       | c.5118G>A<br>(p.(Trp1706*))  | Stop<br>gained  | c.5118G>A<br>(p.(Trp1706*)) | Stop<br>gained  | Hom         | P, P  | P, P  | LP; LP | PVS1_Strong,<br>PM2_Moderate;<br>PVS1_Strong,<br>PM2_Moderate                                                                     | ND  |
| 276  | <i>USH2A</i><br>NM_206933.2       | c.5776+1G>A<br>(p.?)         | Splice<br>donor | c.5776+1G>A<br>(p.?)        | Splice<br>donor | Hom         | P, P  | P, P  | P; P   | PVS1_Strong,<br>PS1_Strong,<br>PM2_Moderate,<br>PM3_Supporting;<br>PVS1_Strong,<br>PS1_Strong,<br>PM2_Moderate,<br>PP3_Supporting | ND  |
| 197  | <i>WFS1</i><br>NM_0011458<br>53.1 | c.1316T>G<br>(p.(Phe439Cys)) | Missense        | -                           |                 | Het         | LP    | P     | LP     | PS1_Strong,<br>PM1_Moderate,<br>PP3_Supporting                                                                                    | ND  |
| 252* | <i>WFS1</i><br>NM_006005.3        | c.1371G>T<br>(p.(Arg457Ser)) | Missense        | -                           |                 | Het         | C     | P     | LP     | PS1_Strong,<br>PM2_Moderate,<br>PM5_Moderate,<br>PP3_Supporting                                                                   | Yes |
| 243  | <i>WFS1</i><br>NM_006005.3        | c.2020G>A<br>(p.(Gly674Arg)) | Missense        | -                           |                 | Het         | C     | P     | LP     | PS1_Strong,<br>PM5_Moderate,<br>PP3_Supporting                                                                                    | ND  |
| 148  | <i>WFS1</i><br>NM_006005.3        | c.2054G>A<br>(p.(Arg685His)) | Missense        | -                           |                 | Het         | US    | US    | LP     | PS1_Strong,<br>PM2_Moderate,<br>PM5_Moderate,<br>PP3_Supporting                                                                   | ND  |

Abbreviations (in alphabetical order):

ACMG/AMP, American College of Medical Genetics and Genomics and the Association for Molecular Pathology; B, benign; C, conflicting interpretations of pathogenicity; Comp het, compound heterozygous; D, deleterious; DC, disease causing; Del, deletion; DVD, deafness variation database; Het, heterozygous; Hom, homozygous; LB, likely benign; LP, likely pathogenic; MT, MutationTaster; N/A, not applicable; ND, not determined; NL, not listed; P, pathogenic; PP2, PolyPhen-2; Seg, segregation testing; T,

tolerated; US, uncertain significance; Zyg, zygosity.

A question mark represents uncertainty about compound heterozygosity.

\* Index patient of a family; other family members are omitted from this table.

# Variant is not listed in ClinVar but linked to dbSNP. The variant type is named after the DVD (Azaiez et al. 2018) or according to VarSome.com (Kopanoss et al. 2019) for variants that were not listed in the DVD.

§ Causal variants derived from single-gene analysis.

## REFERENCES

Azaiez, H., Booth, K. T., Ephraim, S. S., et al. (2018). Genomic Landscape and Mutational Signatures of Deafness-Associated Genes. *Am J Hum Genet*, 103, 484-497.

Kopanoss, C., Tsiolkas, V., Kouris, A., et al. (2019). VarSome: The human genomic variant search engine. *Bioinformatics*, 35, 1978–1980.
