# Supplementary material for: Diagnostic Yield of Targeted Hearing Loss Gene Panel Sequencing in a Large German Cohort With a Balanced Age Distribution from a Single Diagnostic Center: An Eight-year Study
Source: PubMed Central journal article supplement — Ear Hear. 2021 Nov 8;43(3):1049–66. doi: 10.1097/AUD.0000000000001159 (PMC9007094; doi:10.1097/aud.0000000000001159), 2021-11-08
Supplement: aud-43-1049-s005.pdf [file aud-43-1049-s005.pdf]

Diagnostic Yield of Targeted Hearing Loss Gene Panel Sequencing  
in a Large German Cohort with a Balanced Age Distribution  
from a Single Diagnostic Center: An Eight-Year Study

**Supplemental Digital Content 5.**

Distribution of Solved Cases to Syndromic/Non-syndromic Hearing Loss Mimic Genes

| Syndrome                       | Inheritance by family history | Gene (n)                                        | Total (n) | Percentage of solved cases (%) |
|--------------------------------|-------------------------------|-------------------------------------------------|-----------|--------------------------------|
| Waardenburg syndrome           | AR                            | <i>PAX3</i> (n = 1)                             | 5         | 6.7                            |
|                                | AD                            | <i>EDNRB</i> (n = 1)                            |           |                                |
|                                | Sporadic                      | <i>EDNRB</i> (n = 1)                            |           |                                |
|                                |                               | <i>SOX10</i> (n = 1)<br><i>MITF</i> (n = 1)     |           |                                |
| Alport syndrome                | AR                            | <i>COL4A3</i> (n = 2)                           | 4         | 5.3                            |
|                                | X-linked                      | <i>COL4A5</i> (n = 1)                           |           |                                |
|                                | AD                            | <i>COL4A3</i> (n = 1)                           |           |                                |
|                                | Sporadic                      | <i>COL4A3</i> (n = 1)                           |           |                                |
| Pendred syndrome               | Sporadic                      | <i>SLC26A4</i> (n = 2)                          | 4         | 5.3                            |
|                                | AR                            | <i>SLC26A4</i> (n = 2)                          |           |                                |
| Stickler syndrome              | AD                            | <i>COL2A1</i> (n = 1)<br><i>COL11A1</i> (n = 1) | 3         | 4.0                            |
|                                | Sporadic                      | <i>COL9A2</i> (n = 1)                           |           |                                |
|                                | Sporadic                      | <i>USH2A</i> (n = 1)                            |           |                                |
| Usher syndrome                 | AR                            | <i>USH2A</i> (n = 1)                            | 2         | 2.7                            |
|                                | AD                            | <i>TFAP2A</i> (n = 1)                           |           |                                |
| Branchio-oculo-facial syndrome | AD                            | <i>TFAP2A</i> (n = 1)                           | 1         | 1.3                            |
| Beta-mannosidosis              | AR                            | <i>MANBA</i> (n = 1)                            | 1         | 1.3                            |
| All                            |                               |                                                 | 20        | 26.6                           |
