# Supplementary material for: Diagnostic Yield of Targeted Hearing Loss Gene Panel Sequencing in a Large German Cohort With a Balanced Age Distribution from a Single Diagnostic Center: An Eight-year Study
Source: PubMed Central journal article supplement — Ear Hear. 2021 Nov 8;43(3):1049–66. doi: 10.1097/AUD.0000000000001159 (PMC9007094; doi:10.1097/aud.0000000000001159), 2021-11-08
Supplement: aud-43-1049-s006.pdf [file aud-43-1049-s006.pdf]

Diagnostic Yield of Targeted Hearing Loss Gene Panel Sequencing  
in a Large German Cohort with a Balanced Age Distribution  
from a Single Diagnostic Center: An Eight-Year Study

**Supplemental Digital Content 6.**

ClinGen Hearing Loss Gene Curation Expert Panel (HL GCEP) classifications for all 35 genes that contributed to the diagnostic yield

| <b>Gene</b>    | <b>n</b> | <b>Disease association</b>      | <b>Inheritance pattern</b> | <b>Genetic evidence</b> | <b>Experimental evidence</b> | <b>Total points</b> | <b>Final interpretation</b> | <b>Date of finalization</b> |
|----------------|----------|---------------------------------|----------------------------|-------------------------|------------------------------|---------------------|-----------------------------|-----------------------------|
| <i>GJB2</i>    | 19       | Nonsyndromic hearing loss       | AR                         | 12                      | 6                            | 18                  | Definitive                  | 02.03.17                    |
| <i>MYO15A</i>  | 4        | Nonsyndromic hearing loss       | AR                         | 12                      | 6                            | 18                  | Definitive                  | 21.11.17                    |
| <i>COL11A1</i> | 4        | Marshall and Stickler syndromes | AD                         |                         |                              |                     | n.d.                        |                             |
| <i>WFS1</i>    | 4        | Wolfram-like syndrome           | AD                         | 10.5                    | 0.5                          | 11                  | Definitive                  | 17.04.18                    |
| <i>SLC26A4</i> | 4        | Pendred syndrome                | AR                         | 12                      | 6                            | 18                  | Definitive                  | 07.06.17                    |
| <i>TMPRSS3</i> | 3        | Nonsyndromic hearing loss       | AR                         | 12                      | 4.5                          | 16.5                | Definitive                  | 22.08.17                    |
| <i>LOXHD1</i>  | 3        | Nonsyndromic hearing loss       | AR                         | 12                      | 2.5                          | 14.5                | Definitive                  | 08.05.18                    |
| <i>COL4A3</i>  | 3        | Alport syndrome                 | AR, AD                     |                         |                              |                     | n.d.                        |                             |
| <i>EDNRB</i>   | 2        | Waardenburg syndrome            | AD                         | 5                       | 0                            | 5                   | Limited                     | 08.05.18                    |
| <i>MYO6</i>    | 2        | Nonsyndromic hearing loss       | AD                         | 12                      | 3                            | 15                  | Definitive                  | 20.02.18                    |
| <i>USH2A</i>   | 2        | Usher syndrome type 2           | AR                         | 12                      | 6                            | 18                  | Definitive                  | 15.02.17                    |
| <i>MYO7A</i>   | 1        | Nonsyndromic hearing loss       | AD                         | 9.5                     | 3.5                          | 13                  | Definitive                  | 19.03.18                    |
| <i>TECTA</i>   | 1        | Nonsyndromic hearing loss       | AR                         | 12                      | 6                            | 18                  | Definitive                  | 02.01.18                    |

|                 |   |                                                  |          |      |     |      |            |          |
|-----------------|---|--------------------------------------------------|----------|------|-----|------|------------|----------|
| <i>TECTA</i>    | 1 | Nonsyndromic hearing loss                        | AD       | 10.5 | 5.5 | 16   | Definitive | 02.01.18 |
| <i>ACTG1</i>    | 1 | Nonsyndromic hearing loss                        | AD       | 12   | 1   | 13   | Definitive | 07.01.19 |
| <i>CDH23</i>    | 1 | Nonsyndromic hearing loss                        | AR       | 9    | 4.5 | 13.5 | Definitive | 22.05.18 |
| <i>COCH</i>     | 1 | Nonsyndromic hearing loss                        | AD       | 10   | 3.5 | 13.5 | Definitive | 05.01.17 |
| <i>COL2A1</i>   | 1 | Stickler syndrome                                | AD       |      |     |      | n.d.       |          |
| <i>COL4A5</i>   | 1 | Alport syndrome                                  | X-linked |      |     |      | n.d.       |          |
| <i>COL9A2</i>   | 1 | Stickler syndrome                                | AR       |      |     |      | n.d.       |          |
| <i>DIAPH1</i>   | 1 | Hearing loss and<br>macrothrombocytopenia        | AD       | 10   | 6   | 16   | Definitive | 05.01.18 |
| <i>DIAPH3</i>   | 1 | Auditory neuropathy                              | AD       | 2    | 4.5 | 6.5  | Moderate   | 29.03.17 |
| <i>EYA4</i>     | 1 | Nonsyndromic hearing loss                        | AD       | 12   | 2   | 14   | Definitive | 05.01.18 |
| <i>GATA3</i>    | 1 | Hypoparathyroidism, SNHL,<br>and renal dysplasia | AD       |      |     |      | n.d.       |          |
| <i>KCNQ4</i>    | 1 | Nonsyndromic hearing loss                        | AD       | 12   | 5.5 | 17.5 | Definitive | 21.11.17 |
| <i>MANBA</i>    | 1 | Beta-mannosidosis                                | AR       |      |     |      | n.d.       |          |
| <i>MARVELD2</i> | 1 | Nonsyndromic hearing loss                        | AR       | 12   | 5.5 | 17.5 | Definitive | 05.01.18 |
| <i>MITF</i>     | 1 | Waardenburg syndrome                             | AD       | 11,5 | 6   | 17.5 | Definitive | 21.11.17 |
| <i>OTOF</i>     | 1 | Auditory neuropathy                              | AR       | 12   | 5.5 | 17.5 | Definitive | 30.01.17 |
| <i>PAX3</i>     | 1 | Waardenburg syndrome                             | AD       | 12   | 6   | 18   | Definitive | 15.11.17 |
| <i>POU4F3</i>   | 1 | Nonsyndromic hearing loss                        | AD       | 12   | 6   | 18   | Definitive | 21.11.17 |
| <i>SMPX</i>     | 1 | Nonsyndromic hearing loss                        | X-linked | 12   | 2   | 14   | Definitive | 12.09.17 |
| <i>SOX10</i>    | 1 | Waardenburg syndrome                             | AD       | 12   | 5   | 17   | Definitive | 19.06.17 |

|               |   |                              |    |    |     |      |            |          |
|---------------|---|------------------------------|----|----|-----|------|------------|----------|
| <i>STRC</i>   | 1 | Nonsyndromic hearing loss    | AR | 12 | 2.5 | 14.5 | Definitive | 19.12.17 |
| <i>TFAP2A</i> | 1 | Branchiooculofacial syndrome | AD |    |     |      | n.d.       |          |
| <i>TMIE</i>   | 1 | Nonsyndromic hearing loss    | AR | 12 | 6   | 18   | Definitive | 29.09.17 |

Abbreviations:

AR Autosomal recessive;

AD Autosomal dominant;

n.d. not done

SNHL Sensorineural hearing loss

According to and modified from DiStefano MT, Hemphill SE, Oza AM, Siegert RK, Grant AR, Hughes MY, Cushman BJ, Azaiez H, Booth KT, Chapin A, Duzkale H, Matsunaga T, Shen J, Zhang W, Kenna M, Schimmenti LA, Tekin M, Rehm HL, Tayoun ANA, Amr SS; ClinGen Hearing Loss Clinical Domain Working Group. ClinGen expert clinical validity curation of 164 hearing loss gene-disease pairs. *Genet Med.* 2019 Oct;21(10):2239-2247. doi: 10.1038/s41436-019-0487-0. Epub 2019 Mar 21. Erratum in: *Genet Med.* 2019 May 22;: PMID: 30894701; PMCID: PMC7280024.
