# Supplementary material for: Diagnostic Yield of Targeted Hearing Loss Gene Panel Sequencing in a Large German Cohort With a Balanced Age Distribution from a Single Diagnostic Center: An Eight-year Study
Source: PubMed Central journal article supplement — Ear Hear. 2021 Nov 8;43(3):1049–66. doi: 10.1097/AUD.0000000000001159 (PMC9007094; doi:10.1097/aud.0000000000001159), 2021-11-08
Supplement: aud-43-1049-s007.pdf [file aud-43-1049-s007.pdf]

Diagnostic Yield of Targeted Hearing Loss Gene Panel Sequencing  
in a Large German Cohort with a Balanced Age Distribution  
from a Single Diagnostic Center: An Eight-Year Study

**Supplementary Digital Content 7.**

Table showing List of Heterozygous Clinically Significant Variants in Undiagnosed Patients

| ID  | Solved | Gene          | Transcript     | g. Position       | c. Position | p. Position  | gnomAD max AF        |
|-----|--------|---------------|----------------|-------------------|-------------|--------------|----------------------|
| 96  | No     | <i>ADGRV1</i> | NM_032119.3    | chr5:89924617C>T  | c.1477C>T   | p.Arg493*    | $2.0 \times 10^{-5}$ |
| 215 | No     | <i>ADGRV1</i> | NM_032119.3    | chr5:89949365C>T  | c.3974C>T   | p.Thr1325Met | $4.4 \times 10^{-5}$ |
| 281 | No     | <i>ADGRV1</i> | NM_032119.3    | chr5:90119413G>C  | c.16368G>C  | p.Lys5456Asn | Not listed           |
| 241 | No     | <i>ALMS1</i>  | NM_015120.4    | chr2:73612999G>A  | c.3G>A      | p.?          | Not listed           |
| 77  | No     | <i>BSND</i>   | NM_057176.2    | chr1:55464869G>T  | c.10G>T     | p.Glu4*      | $3.9 \times 10^{-6}$ |
| 207 | No     | <i>CDH23</i>  | NM_022124.5    | chr10:73375261G>A | c.833G>A    | p.Gly278Glu  | Not listed           |
| 222 | No     | <i>CDH23</i>  | NM_022124.5    | chr10:73545409C>T | c.5734C>T   | p.Arg1912Trp | $2.6 \times 10^{-5}$ |
| 53  | No     | <i>CDH23</i>  | NM_022124.5    | chr10:73567275G>A | c.8311G>A   | p.Gly2771Ser | $3.9 \times 10^{-4}$ |
| 258 | No     | <i>CDH23</i>  | NM_022124.5    | chr10:73572583C>T | c.9569C>T   | p.Ala3190Val | $3.3 \times 10^{-4}$ |
| 229 | No     | <i>CIB2</i>   | NM_006383.3    | chr15:78403509G>A | c.196C>T    | p.Arg66Trp   | $2.4 \times 10^{-5}$ |
| 14  | No     | <i>CLDN14</i> | NM_144492.2    | chr21:37833905C>T | c.89G>A     | p.Trp30*     | $4.6 \times 10^{-6}$ |
| 235 | No     | <i>CLDN14</i> | NM_144492.2    | chr21:37833752C>T | c.242G>A    | p.Arg81His   | $1.6 \times 10^{-5}$ |
| 164 | No     | <i>CLRN1</i>  | NM_001195794.1 | chr3:150645894A>C | c.567T>G    | p.Tyr189*    | $6.8 \times 10^{-4}$ |
| 283 | No     | <i>COCH</i>   | NM_001347720.1 | chr14:31349849C>T | c.733C>T    | p.Arg245*    | $7.9 \times 10^{-6}$ |

|     |    |               |                |                    |             |                  |                      |
|-----|----|---------------|----------------|--------------------|-------------|------------------|----------------------|
| 291 | No | <i>COCH</i>   | NM_001347720.1 | chr14:31349849C>T  | c.733C>T    | p.Arg245*        | $7.9 \times 10^{-6}$ |
| 177 | No | <i>FOXI1</i>  | NM_012188.4    | chr6:169533053A>G  | c.92A>G     | p.Tyr31Cys       | $2.8 \times 10^{-5}$ |
| 98  | No | <i>GJB2</i>   | NM_004004.5    | chr13:20763686delC | c.35del     | p.Gly12Valfs*2   | $7.9 \times 10^{-3}$ |
| 136 | No | <i>GJB2</i>   | NM_004004.5    | chr13:20763452A>G  | c.269T>C    | p.Leu90Pro       | $6.4 \times 10^{-4}$ |
| 173 | No | <i>GJB2</i>   | NM_004004.5    | chr13:20763620A>G  | c.101T>C    | p.Met34Thr       | $8.6 \times 10^{-3}$ |
| 295 | No | <i>GJB2</i>   | NM_004004.5    | chr13:20763620A>G  | c.101T>C    | p.Met34Thr       | $8.6 \times 10^{-3}$ |
| 186 | No | <i>GJB2</i>   | NM_004004.5    | chr13:20763612C>T  | c.109G>A    | p.Val37Ile       | $7.7 \times 10^{-3}$ |
| 205 | No | <i>GJB2</i>   | NM_004004.5    | chr13:20763612C>T  | c.109G>A    | p.Val37Ile       | $7.7 \times 10^{-3}$ |
| 166 | No | <i>GJB2</i>   | NM_004004.5    | chr13:20763234T>C  | c.487A>G    | p.Met163Val      | $1.4 \times 10^{-4}$ |
| 178 | No | <i>GJB2</i>   | NM_004004.5    | chr13:20763234T>C  | c.487A>G    | p.Met163Val      | $1.4 \times 10^{-4}$ |
| 303 | No | <i>GJB2</i>   | NM_004004.5    | chr:20763486del    | c.235del    | p.Leu79Cysfs*3   | $4.6 \times 10^{-4}$ |
| 164 | No | <i>GRXCR1</i> | NM_001080476.2 | chr4:42964963C>T   | c.439C>T    | p.Arg147Cys      | $5.2 \times 10^{-5}$ |
| 156 | No | <i>ILDR1</i>  | NM_001199799.1 | chr3:121713035G>A  | c.772C>T    | p.Gln258*        | $5.0 \times 10^{-4}$ |
| 158 | No | <i>LHFPL5</i> | NM_182548.3    | chr6:35782414C>G   | c.504C>G    | p.Tyr168*        | Not listed           |
| 199 | No | <i>LOXHD1</i> | NM_001145472.2 | chr18:44089768C>T  | c.2077G>A   | p.Glu693Lys      | $7.7 \times 10^{-4}$ |
| 237 | No | <i>LOXHD1</i> | NM_144612.6    | chr18:44143129G>A  | c.2497C>T   | p.Arg833*        | $2.5 \times 10^{-5}$ |
| 22  | No | <i>MYO15A</i> | NM_016239.3    | chr17:18034553A>T  | c.4039A>T   | p.Ile1347Phe     | $8.0 \times 10^{-6}$ |
| 216 | No | <i>MYO15A</i> | NM_016239.3    | chr17:8035800G>A   | c.4240G>A   | p.Glu1414Lys     | $4.1 \times 10^{-6}$ |
| 102 | No | <i>MYO15A</i> | NM_016239.3    | chr17:18024983delC | c.2873del   | p.Pro958Leufs*28 | $2.9 \times 10^{-4}$ |
| 282 | No | <i>MYO7A</i>  | NM_000260.3    | chr11:76909539G>C  | c.4442-1G>C | p.?              | $4.0 \times 10^{-6}$ |

|     |    |                |                |                                      |                        |                   |                      |
|-----|----|----------------|----------------|--------------------------------------|------------------------|-------------------|----------------------|
| 100 | No | <i>NDP</i>     | NM_000266.3    | chrX:43809178C>T                     | c.269G>A               | p.Arg90His        | $2.4 \times 10^{-5}$ |
| 155 | No | <i>OTOG</i>    | NM_001277269.1 | chr11:17582364G>T                    | c.1487G>T              | p.Cys496Phe       | Not listed           |
| 179 | No | <i>SLC26A4</i> | NM_000441.1    | chr7:107301201T>C                    | c.-103T>C              | p.?               | $5.5 \times 10^{-3}$ |
| 3   | No | <i>SLC26A4</i> | NM_000441.1    | chr7:107312690G>T                    | c.412G>T               | p.Val138Phe       | $1.7 \times 10^{-4}$ |
| 173 | No | <i>SLC26A4</i> | NM_000441.1    | chr13:20763620A>G                    | c.103T>C               | p.?               |                      |
| 78  | No | <i>STRC</i>    | NM_153700.2    | chr15:g.(?_43892732)_(43901532_?)del | c.(?_3499)_(4993_?)del | p.?               |                      |
| 150 | No | <i>STRC</i>    | NM_153700.2    | chr15:g.(?_43891870)_(43910920_?)del | c.(?_1)_(5328_?)del    | p.?               |                      |
| 161 | No | <i>STRC</i>    | NM_153700.2    | chr15:g.(?_43891870)_(43910920_?)del | c.(?_1)_(5328_?)del    | p.?               |                      |
| 166 | No | <i>STRC</i>    | NM_153700.2    | chr15:g.(?_43891870)_(43910920_?)del | c.(?_1)_(5328_?)del    | p.?               |                      |
| 77  | No | <i>TMPRSS3</i> | NM_024022.2    | chr21:43808545G>T                    | c.413C>A               | p.Ala138Glu       | $1.6 \times 10^{-3}$ |
| 153 | No | <i>TMPRSS3</i> | NM_024022.2    | chr21:43808545G>T                    | c.413C>A               | p.Ala138Glu       | $1.6 \times 10^{-3}$ |
| 217 | No | <i>TMPRSS3</i> | NM_024022.2    | chr21:43804116insT                   | c.579dup               | p.Cys194Metfs*17  | $3.6 \times 10^{-5}$ |
| 268 | No | <i>TMPRSS3</i> | NM_024022.2    | chr21:43803171C>G                    | c.753G>C               | p.Trp251Cys       | $1.3 \times 10^{-4}$ |
| 228 | No | <i>TMPRSS3</i> | NM_024022.2    | chr21:43802210C>T                    | c.916G>A               | p.Ala306Thr       | $1.4 \times 10^{-4}$ |
| 184 | No | <i>TRIOBP</i>  | NM_001039141.2 | chr22:38130773delG                   | c.4436del              | p.Gly1479Alafs*28 | Not listed           |
| 275 | No | <i>USH1C</i>   | NM_153676.3    | chr11:17547990T>A                    | c.580-2A>T             | p.?               | Not listed           |
| 180 | No | <i>USH1G</i>   | NM_173477.4    | chr17:72916621T>C                    | c.310A>G               | p.Met104Val       | $1.4 \times 10^{-4}$ |

---

Genomic coordinates are mapped to the GRCh37 genome assembly
